1 **Rice *TSV3* Encoding Obg-like GTPase Protein is Essential for**  
2 **Chloroplast Development during the Early Leaf Stage under Cold**  
3 **Stress**

4  
5 Dongzhi Lin<sup>1</sup>, Quan Jiang<sup>1</sup>, Xiaojing Ma<sup>1</sup>, Kailun Zheng<sup>1</sup>, Xiaodi Gong<sup>1,2</sup>, Sheng Teng<sup>3</sup>,  
6 Jianlong Xu<sup>4</sup>, and Yanjun Dong<sup>1\*</sup>

7  
8 <sup>1</sup> Development Center of Plant Germplasm Resources, College of Life and Environment Sciences,  
9 Shanghai Normal University, Shanghai 200234, China

10 <sup>2</sup>Institute of Genetics and Developmental Biology Chinese Academy of Sciences No.1 West  
11 Beichen Road, Chaoyang District, Beijing, 100101 China;

12 <sup>3</sup> Shanghai Institutes for Biological Sciences, Chinese Academy of Sciences, Shanghai 200032,  
13 China

14 <sup>4</sup>The Institute of Crop Sciences, Chinese Academy of Agricultural Sciences, 12 South  
15 Zhong-Guan Cun Street, Beijing 100081, China

16  
17 Corresponding author: Development Center of Plant Germplasm Sources, College of Life and  
18 Environmental Sciences, Shanghai Normal University, Shanghai  
19 200234, China. E-mails: dong@shnu.edu.cn

20

21

22 **Running Title:** Rice *TSV3* is essential for chloroplast development under cold stress

23

24

25

26

27

28

29

30

31 **ABSTRACT** The Spo0B-associated GTP-binding (Obg) proteins occupy a wide variety  
32 of roles in the viability of nearly all bacteria. Its detailed roles in higher plants have not  
33 yet been elucidated. A novel rice thermo-sensitive virescent mutant *tsv3* was identified in  
34 this study that displayed albino phenotype at 20°C before the 3-leaf stage while being  
35 normal green at 32°C or even at 20°C after the 4-leaf stage. The mutant phenotype was  
36 aligned with altered chlorophyll (Chl) content and chloroplast development. Map-based  
37 cloning and complementation test showed that *TSV3* encoded a kind of small GTP  
38 binding protein. Subcellular localization revealed that *TSV3* was in chloroplast. *TSV3*  
39 transcripts were highly expressed in leaves and weak or undetectable in other tissues,  
40 suggesting the tissue-specific expression. In *tsv3* mutant, the transcriptional levels of  
41 certain genes associated with biogenesis of chloroplast ribosomes 50S subunit were  
42 severely decreased at the 3-leaf-stage under cold stress, but could be recovered to normal  
43 levels at a higher temperature (32°C). The observations from this study indicated that the  
44 rice nuclear-encoded *TSV3* plays important roles in chloroplast development at early leaf  
45 stage under cold stress.

46

47 **KEYWORDS** Chloroplast development, Ribosome biogenesis, Rice (*Oryza sativa* L.),  
48 Spo0B GTP-binding protein (Obg), Thermo-sensitive virescent

49

50

51

52

53

54

55

56

57

58

59 Chloroplast is a semi-autonomous organelle containing many genes important for  
60 metabolic pathways of photosynthesis (Mandel et al. 1996). Chloroplast development  
61 during leaf development consists of a series of complex events associated with  
62 chloroplast differentiation and can be divided into three steps coordinately regulated by  
63 the plastid and nucleus genes (Mullet 1993; Kusumi et al. 2011). The first step involves  
64 the activation of plastid replication and plastid DNA synthesis. The second step is the  
65 chloroplast “build-up”, characterized by the establishment of chloroplast genetic system.  
66 At this step nuclear-encoded plastid RNA polymerase (NEP) preferentially transcribes  
67 plastid genes encoding plastid gene expression machineries (Hajdukiewicz et al.1997),  
68 and the transcription and translation activities in the chloroplast are dramatically  
69 increased. At third step, the plastid and nuclear genes encoding photosynthetic apparatus  
70 are expressed at very high levels. Plastid genes for photosynthetic apparatus are  
71 predominantly transcribed by plastid-encoded RNA polymerase (PEP) (Santis-Maciossek  
72 et al., 1999). All expressions of these genes lead to the synthesis and assembly of  
73 chloroplast. In spite of these, the mechanisms of the major genes in higher plants remain  
74 largely unknown (Pfalz and Pfannschmidt 2012).

75 GTPases are a large family of enzymes that hydrolyze guanosine triphosphate (GTP).  
76 GTPases are uncovered universally in all kingdoms of life and play a crucial role in many  
77 cellular processes (Bourne et al. 1990). The Spo0B-associated GTP-binding (Obg) protein  
78 subfamily of GTPases was originally identified at downstream of the Spo0B gene in  
79 *Bacillus subtilis* (Trach and Hoch 1989). Typical Obgs are large GTPases which  
80 contained three domains, i.e., the Obg fold, G domain and Obg C-terminal region (OCT)  
81 (Buglino et al. 2002; Kukimoto-Niino et al. 2004). The Obgs proteins have been shown to  
82 be essential for the viability of nearly all bacteria (Maddock et al. 1997; Okamoto and  
83 Ochi 1998; Shepherd et al. 2002; Foti et al. 2005; Michel 2005). It is noteworthy that the  
84 majority of Obg proteins studied to date are associated with the ribosome except that  
85 ObgE is involved in *Escherichia coli* chromosome partitioning, partially associated with  
86 the membrane (Kobayashi et al. 2001). For example, Obgs from *Bacillus subtilis*,  
87 *Caulobacter crescentus* and *Escherichia coli* have been reported to be associated with the  
88 50S ribosomal subunit (Scott et al. 2000; Lin et al. 2004; Wout et al. 2004) and the

89 mutations have been shown to affect ribosome assembly or maturation (Datta et al. 2004;  
90 Jiang et al. 2006). Recently, two mutations in Obg fold and OCT region impaired the  
91 ability of *Bacillus* Obg to associate with ribosomes and to induce a general stress  
92 regulation, speculating that Obg may have dual functions in ribosome biogenesis and  
93 stress responses (Kuo et al. 2008). In eukaryotic cell, certain studies showed that an  
94 *Arabidopsis* Obg homolog, AtObgC/CPSAR1, localized both the inner envelope and the  
95 stroma of chloroplasts, is essential for the formation of normal thylakoid membranes  
96 (Garcia et al. 2010); However, others reported it may play an important role in the  
97 biogenesis of chloroplast ribosomes (Bang et al. 2009). More recently, based on results of  
98 studies on *Arabidopsis* AtObgC/CPSAR1 and rice *OsObgC*, Bang et al. (2012) reported  
99 that ObgC functions primarily in plastid ribosome biogenesis during chloroplast  
100 development.

101 Rice (*Oryza sativa*) mutants are ideal materials to explicate the function of chloroplast  
102 development in higher plants. In this study, a new rice thermo-sensitive virescent mutant  
103 *tsv3*, which exhibited the albino phenotype before the 3-leaf stage at 20°C and normal  
104 green at 32°C or even at 20°C after the 4-leaf stage, was used. The mutation of rice *TSV3*,  
105 encoding the Obg subfamily of small GTP-binding protein, was responsible for the  
106 mutant phenotype. Additionally, the transcript levels of genes associated with chlorophyll  
107 biosynthesis and photosynthesis, of some genes associated with biogenesis of chloroplast  
108 ribosomes 50S subunit were severely affected in *tsv3* mutants at low temperature. The  
109 findings implicated rice *TSV3* plays an important role in chloroplast development during  
110 leaf development under cold stress.

111

## 112 **MATERIALS and METHODS**

### 113 **Plant materials and growth conditions**

114 The rice thermo-sensitive virescent mutant *tsv3* was discovered in our mutant pool from  
115 Jiahua 1 (WT, *japonica* rice variety) irradiated with <sup>60</sup>Co gamma rays in 2006. The F<sub>2</sub>  
116 population for genetic mapping was generated from a cross between Pei'ai 64S (*indica*)  
117 and *tsv3* mutant. The thermo-sensitive virescent phenotype in *tsv3* mutant can be  
118 distinguished from normal green at Hainan (winter season, subtropical climate) and

119 Shanghai (spring season, temperate climate), China under local growing conditions. WT  
120 and *tsv3* plants were grown in growth chambers under controlled 12 h of light and 12 h of  
121 dark at a constant temperature of 20°C and 32°C, respectively, for phenotypic  
122 characterization, pigment content measurement and RNA extraction.

123

#### 124 **Chlorophyll (Chl) and carotenoid (Car) content measurement**

125 Both Chl and Car contents were assessed using a spectrophotometer following the slightly  
126 modified methods of Arnon (1949) and Wellburn (1994). Briefly, fresh leaves (0.2 g each  
127 sample) from the 3-leaf-stage seedlings grown at 20°C and 32°C, respectively, were  
128 fetched, cut and homogenized in 5 mL of acetone:ethanol:H<sub>2</sub>O (by 5:4:1 vol.) for 18 h  
129 under dark conditions, progressively. Residual debris was removed by centrifugation. The  
130 supernatants were analyzed with a UV5100 Spectrophotometer (Beckman Coulter, USA)  
131 at 663, 645 and 470 nm.

132

#### 133 **Transmission electron microscopy (TEM)**

134 For TEM analysis, transverse sections were sampled from the same parts of the top leaves  
135 at the 3-leaf-stage of seedlings grown at 20°C and 32°C, respectively. Samples were fixed  
136 in a solution of 2.5% glutaraldehyde first, then in 1% OsO<sub>4</sub> buffer at 4°C for 5h after  
137 vacuum. After staining with uranyl acetate, tissues were further dehydrated in an ethanol  
138 series and finally embedded in Spurr's medium prior to ultrathin sectioning. Samples  
139 were stained again and examined with a Hitachi-7650 (Hitachi, Tokyo, Japan)  
140 transmission electron microscope.

141

#### 142 **Mapping of *TSV3* gene**

143 Rice genomic DNA was extracted from fresh leaves by the modified CTAB method  
144 (Murray and Thompson 1980). Totally, 1,430 plants with the mutant phenotype were  
145 selected from F<sub>2</sub> populations for mapping of the *TSV3* locus. Initially, we adopted 81 SSR  
146 primers based on the Gramene database (<http://www.gramene.org>). New SSR and InDel  
147 markers were developed based on the entire genomic sequences of the *japonica*  
148 Nipponbare variety (Goff et al 2002) and the *indica* variety 9311 (Yu et al. 2002). Details

149 of the markers used for mapping were listed in Supplemental Table 1. The genomic DNA  
150 fragments of the candidate genes from the mutant and WT plants were amplified and  
151 sequenced. The sequencing reaction was performed by Sinogenomax Co., Ltd. The  
152 function and ORFs of the candidate genes were obtained from TIGR  
153 (<http://rice.plantbiology.msu.edu/cgi-bin/gbrowse/rice/>). Conserved domain structures  
154 were predicted through SMART (<http://smart.embl-heidelberg.de/>).

155

#### 156 **RT-PCR and realtime PCR (qPCR) analysis**

157 To examine the expression pattern of *TSV3*, the WT RNA was extracted from germinating  
158 bud, plumules, roots, stems and leaves at seedling-stage, flag leaves and young panicles at  
159 heading stage using an RNA Prep Pure Plant kit (Tiangen Co., Beijing, China) and was  
160 reversely transcribed by ReverTra Ace (ToYoBo, Osaka, Japan) following the  
161 manufacturer's instructions. RT-PCR analysis was carried out to assess *TSV3* transcript  
162 levels. For transcriptional analysis of *TSV3* and other 23 genes associated with Chl  
163 biosynthesis, chloroplast development and photosynthesis (*HEMA1*, *CAO1*, *YGL1*, *PORA*,  
164 *Cab1R*, *RbcS*, *RbcL*, *PsaA*, *PsbA*, *LhcbII*, *RNRS*, *RNRL*, *V2*, *OsRpoTp*, *OsPoLPI*, *FtsZ*,  
165 *RpoA*, *RpoB*, *Rps7*, *Rps20*, *Rpl21*, *16SrRNA* and *23SrRNA*) in rice, total RNA was  
166 extracted from the 3<sup>rd</sup> leaves of WT and *tsv3* plants. qPCR analyses were performed using  
167 a SYBR Premix Ex Taq<sup>TM</sup> kit (TaKaRa) on an ABI7500 Realtime PCR System (Applied  
168 Biosystems; <http://www.appliedbiosystems.com>), and the relative quantification of gene  
169 expression data was performed as described by Livak and Schmittgen (2001). The  
170 specific primers for qPCR were designed according to both Wu et al. (2007) and  
171 NCBI-published sequences and were listed in Supplemental Table 2. The rice *Actin* gene  
172 was used as a reference gene.

173

#### 174 **Complementation test**

175 A 8.3-kb genomic DNA fragment covering the entire *TSV3* gene, plus each 2.0 kb  
176 upstream and downstream sequence, was amplified from the WT parent with the primer  
177 pair *TSV3F*: 5'-GGGGTACCCCTTGACATACCTCTCCTGTTTGC-3' and *TSV3R*:  
178 5'-CGGGATCCCGCTGGGTTGGACAGATAATATGC-3'. The underlined sequences

179 represent the cleavage sites of *KpnI* and *BamHI*, respectively. The PCR product was  
180 ligated with the pMD18-T vector (TaKaRa, Japan), and the fragment was subcloned into  
181 the pCAMBIA1301 binary vector (CAMBIA; <http://www.cambia.org.au>) after sequence  
182 verification. The resultant pCAMBIA1301-TSV3 plasmid and the empty vector as control  
183 were transferred into *Agrobacterium tumefaciens* EHA105 and were introduced into the  
184 *tsv3* mutant via agrobacterium-mediated transformation (Hiei et al. 1994). The genotype  
185 of transgenic plants was determined by PCR amplification of the *hygromycin*  
186 *phosphotransferase* gene (*hpt*) with primers *HPTF*  
187 (5'-GGAGCATATACGCCCGGAGT-3') and *HPTR*  
188 (5'-GTTTATCGGCACTTTGCATCG-3') and *GUS* gene with primers *GUSF*  
189 (5'-GGGATCCATCGCAGCGTAATG-3') and *GUSR*  
190 (5'-GCCGACAGCAGCAGTTTCATC-3') as selection.

191

#### 192 **Subcellular localization**

193 To investigate the subcellular localization of TSV3 protein, a cDNA fragment containing  
194 the N-terminal region (amino acids 1-280) of *TSV3* was amplified from total RNA in WT  
195 plants using primer pair 5'-GAAGATCTATGCCGCTCCTCCTCCAC-3' (restriction site  
196 of *BglII*); 5'-GGGGTACCCACCAACGTCTGCAACCAC-3' (restriction site of *KpnI*)  
197 and was introduced into vector pMON530-GFP. The pMON530:CaMV35S:TSV3-GFP  
198 plasmid was then transferred into *Agrobacterium* EHA105 after sequence verification.  
199 For subcellular localization of TSV3, transient expression assays were performed in  
200 tobacco (*Nicotiana tabacum*) according to the method described by Jiang et al. (2014).  
201 The GFP fluorescence images were obtained using argon ion laser excitation of 488 nm  
202 with a 505–530 nm band-pass filter.

203

#### 204 **Sequence and phylogenetic analyses**

205 Gene prediction was performed using the Rice Genome Annotation Project database  
206 (RGAP, <http://rice.plantbiology.msu.edu/>). The full-length amino acid sequence of *TSV3*  
207 and most similar sequences identified via BLAST search were aligned with the MUSCLE  
208 tool (Edgar 2004) using the default parameters. A neighbor-joining tree was constructed

209 using MEGA v5.2 software (<http://www.megasoftware.net/>; Tamura et al., 2011) by the  
210 bootstrap method with 1,000 replicates. Multiple sequence alignments were conducted  
211 with BioEdit software (<http://www.mbio.ncsu.edu/BioEdit/bioedit.html>; Hall 1999).

212

## 213 **RESULTS**

### 214 **Phenotype characterization of the *tsv3* mutant**

215 The leaves of *tsv3* mutant only appeared albino phenotype before the 4-leaf stage when  
216 grown at 20°C (Figure 1A,C), gradually turned yellowish green, and finally normal green  
217 after the 4-leaf stage even at 20°C or a higher temperature (32°C) (Figure 1B). Consistent  
218 with the mutant phenotype, the Chl a, Chl b, and Car contents in *tsv3* 3<sup>rd</sup> leaves were  
219 drastically lower than those in WT at 20°C (Figure 1D); however, they were comparable  
220 between WT and *tsv3* plants at 32°C (Figure 1E). The observations showed that the *tsv3*  
221 mutant has the thermo-sensitivity of virescent phenotype at the early seedling stage.

222 TEM analysis of chloroplasts was performed to examine if the lack of photosynthetic  
223 pigments in the *tsv3* mutant at low temperatures was accompanied by chloroplast  
224 ultrastructural changes. As it was expected, the grana lamella stacks in WT plants were  
225 dense and well-structured, regardless of lower or higher temperatures (Figure 2A, C). In  
226 *tsv3* mutant, the chloroplast structure at 20°C was not intact and less grana lamella stacks  
227 (Figure 2D), however it exhibited well-developed lamella structures (Figure 2B) at 32°C  
228 similar to WT (Figure 2A,C), suggesting the *tsv3* mutation only resulted in malformed  
229 chloroplast before 4-leaf stage under cold stress (20°C). Moreover, except for slight  
230 reduction in plant-height after transplanting (Supplemental Figure 1A), certain  
231 yield-related traits such as, panicle number, grains per panicle and 1000-grain weight  
232 (Supplemental Figure 1B) had no significant differences between *tsv3* and WT plants,  
233 indicating that *tsv3* mutation did not have obviously negative effects on growth under the  
234 field condition.

235

### 236 **Cloning of the *TSV3* gene**

237 To understand the molecular mechanism responsible for the mutant phenotype,  
238 map-based cloning was used to identify the *TSV3* locus. Resultantly, the F<sub>1</sub> plants from



239 the cross of Pei'ai64S/*tsv3* were all normal green and the F<sub>2</sub> population displayed a  
240 segregation pattern fitted a ratio of 3 to 1 (green: albino phenotype =453:132;  $\chi^2=3.45$ ;  
241  $P>0.05$ ), demonstrating the albino phenotype is a recessive trait controlled by a single  
242 gene (*tsv3*). Initially, *tsv3* was mapped between the markers P1 and RM570 on  
243 chromosome 3 using 214 mutant individuals (Figure 3A). Ultimately, *tsv3* was narrowed  
244 to a 36kb interval between markers P2 and P5 on BAC clone AP104321 and no  
245 recombinant was found near the marker P3 and P4 (Figure 3A). Within this target region,  
246 seven candidate genes were predicted using the program RGAP  
247 (<http://rice.plantbiology.msu.edu>). All candidate genes were then sequenced and verified  
248 only four discontinuous nucleotide deletion (CAA\*G) in the *tsv3* mutant (Figure 3A), at  
249 the first exon of *LOC\_Os03g58540*, encoding an Obg subfamily of small GTP-binding  
250 protein, caused a premature stop codon of translation and resulted in a frame-shift  
251 mutation. In addition, the significant up-regulation for *LOC\_Os03g58540* transcript in  
252 *tsv3* mutant, as compared with the WT plants at 20°C (Figure 3B), also indicated the  
253 possible existence of the *LOC\_Os03g58540* mutation in *tsv3* mutant.

254 To further confirm that the *LOC\_Os03g58540* mutation was responsible for the mutant  
255 phenotype, a genetic complementation test was performed. Resultantly, all of the 23  
256 independent transgenic plants transformed with the vector of  
257 pCAMBIA1301:*LOC\_Os03g58540* driven by its own promoter were completely reverted  
258 to green leaf as WT plants. And the T<sub>1</sub> generations derived from the transgenic T<sub>0</sub> plants  
259 appeared the separation at 20°C (Figure 3C). This affirmed the *LOC\_Os03g58540*  
260 corresponded to the *TSV3* gene.

261

### 262 **Characterization of TSV3 protein**

263 TSV3 was predicted to be a 504-amino acid polypeptide with a calculated molecular mass  
264 of 54.5 kD. Conserved domain analysis showed that TSV3 contains a Spo0B-associated  
265 GTP-binding protein (the Obg subfamily of small GTP binding protein) and a 50S  
266 ribosomal subunit binding site domain by pfam (<http://pfam.janelia.org>).

267 Orthologs of TSV3 was found in *Arabidopsis thaliana*, *Populus trichocarpa*, *Ricinus*

268 *communis*, *Vitis vinifera*, *Brachypodium*, *Glycine max*, *Sorghum bicolor* and *Zea mays*  
269 through NCBI and can be divided into two (I, II) groups (Figure 4B). Furthermore, group  
270 I can clearly be divided into two sub-branch(Ia,b).The sequences were highly conserved  
271 within higher plants, and TSV3 exhibited a maximum 84.9 % amino acid identity with  
272 orthologs TSV3 from *Zea mays* and shared 83.3 % similarity with orthologs TSV3 from  
273 *Sorghum bicolor* (Figure 4A). Notably, it was found the existence of three rice homologous  
274 *Obg* genes, *TSV3*, formerly termed as *OsObgC2* (Bang et al. 2009),  
275 *OsObgC1*(*LOC\_Os07g47300*, Bang et al., 2009 and 2012), and *OsObgM* (*LOC\_Os*  
276 *11g47800*, Bang et al. 2009). As shown in Figure 4B, the TSV3 can be clearly divided  
277 into monocots and dicotyledons within Ib sub-branch. In addition, the predicted 3D  
278 structure (Supplemental Figure 2) of TSV3 (Ib branch) more likes both *OsObgM* and  
279 *AtObgM* (II group) than *OsObgC1* (Ia branch).

280

### 281 **Subcellular localization of TSV3**

282 The TSV3 was predicted to be localized in chloroplasts by TargetP (Emanuelsson et al.  
283 2000, <http://www.cbs.dtu.dk/services/TargetP/>) and iPSORT (<http://ipsort.hgc.jp/>). To  
284 verify this prediction, the pMON530:CaMV35S:TSV3-GFP plasmid was introduced into  
285 tobacco cells for a transient expression assay. At the same time, the empty GFP driven by  
286 the 35S promoter was transformed into tobacco cells as a control. Resultantly, in tobacco  
287 mesophyll cells transformed with the pMON530:CaMV35S:TSV3-GFP plasmid, GFP  
288 fluorescence perfectly overlapped with chloroplast autofluorescence (Figure 5B), while  
289 the empty GFP vector without a specific targeting sequence had green fluorescent signals  
290 in both the in cytoplasm and nucleus (Figure 5A). The results confirmed that TSV3 is  
291 localized in the chloroplast.

292

### 293 **Expression pattern of TSV3**

294 Reverse transcription (RT)-PCR was performed to examine the expression pattern of  
295 *TSV3*. A significantly high level of expression in seedling- and flag-leaves was detected,  
296 while weak expression in both roots and stems, and undetectable in both germinating bud  
297 and young panicles (Figure 6A), indicating that *TSV3* mainly functions in leaves. This

298 was consistent with the data from rice gene expression profiling in the RiceXPro database  
299 (Supplemental Figure 3). In addition, the expression level of *TSV3* basically increased  
300 along with the leaf development from plumule to the 5th leaves (Figure 6B). It was noted  
301 that the *TSV3* transcript accumulation in the seedling-leaves was much more than that in  
302 the flag-leaves (Figure 6A). The results showed that *TSV3* might play an important role in  
303 leaf chloroplast development, especially for seedling stage.

304

### 305 **The mutation of *TSV3* affects expression of associated genes**

306 The transcript levels of genes for Chl biosynthesis, photosynthesis and chloroplast  
307 development both in the *tsv3* mutant and WT at 20°C and 32°C were examined. The  
308 expressions of genes for Chl biosynthesis (Wu et al. 2007), such as *CAOI*  
309 (*CHLOROPHYLLIDE A OXYGENASE1*), *HEMA1* (encoding glutamyl tRNA reductase),  
310 *YGL1* (encoding a Chl synthetase) and *PORA* (encoding NADPH-dependent  
311 protochlorophyllide oxidoreductase) were obviously down-regulated in the mutant  
312 (Figure 7A) at 20°C, in consistent with the decreased Chl content (Figure 1D) and the  
313 albino phenotype (Figure 1A, C). The photosynthesis associated transcripts from plastid  
314 genes *Cab1R* (encoding the light harvesting Chla/b-binding protein of PSII), *PsaA* and  
315 *PsbA* (encoding two reaction center polypeptides), and *RbcL* (encoding the large subunit  
316 of Rubisco) and the nuclear *RbcS* (encoding the small subunit of Rubisco) (Kyojuka et al.  
317 1993) were greatly suppressed in the mutant at 20°C (Figure 7B). However, at 32°C,  
318 nearly all of transcriptional levels of the affected genes abovementioned were recovered  
319 to WT levels or slightly higher levels (Figure 8A, B).

320 With regarding chloroplast-development associated genes, we investigated both  
321 nuclear-encoded genes [*RNRS* and *RNRL*, encoding the large and small subunits of  
322 ribonucleotide reductase (Yoo et al., 2009), *V2* encoding plastidal guanylate kinase  
323 (Sugimoto et al., 2007), *OsRpoTp* encoding NEP core subunits (Hiratsuka et al., 1989),  
324 *OsPoLPI* encoding one plastidal DNA polymerase (Vitha et al., 2001), *Rpl21* encoding  
325 the ribosomal protein L21 and *FtsZ* encoding a component of the plastid division  
326 machinery (Takeuchi et al., 2007)] and plastid-encoded genes [23S rRNA (23S ribosomal  
327 RNA), 16S rRNA (16S ribosomal RNA), *Rps7* encoding one ribosomal protein (Kusumi

328 et al. 2011), *Rps20* encoding ribosomal protein S20, *RpoA* and *RpoB* encoding the PEP  
329 core  $\alpha$ ,  $\beta$  subunit (Kusumi et al. 2011)]. Resultantly, in the *tsv3* mutant, the transcriptional  
330 levels of *FtsZ*, *23S rRNA* and *Rpl21* were remarkably reduced while other genes  
331 displayed WT levels or slightly higher levels at 20°C (Figure 7C). Interestingly, all  
332 affected genes were recovered to WT levels at 32°C (Figure 8C). It was possible that the  
333 abnormal expression of these key genes (*FtsZ*, *23S rRNA* and *Rpl21*) led to the mutant  
334 phenotype under cold stress.

335

## 336 **DISCUSSION**

337 In this study, we isolated a rice novel Obg subfamily of small GTP-binding protein gene  
338 *TSV3* by a map-based cloning strategy with a new rice thermo-sensitive virescent mutant  
339 *tsv3*. The virescent phenotype resulted from the four discrete deletion in *tsv3* mutant,  
340 which drastically affected the expression levels of some genes associated with Chl  
341 biosynthesis and photosynthesis (Figure 7A, B) and some key genes associated with  
342 chloroplast development such as *FtsZ*, *Rpl21* and *23SrRNA* (Figure 7C). This study  
343 demonstrates that the rice *TSV3* might play important role for early chloroplast  
344 development under cold stress.

345

### 346 ***TSV3* is needed for early chloroplast development under cold stress**

347 At low temperature (20°C), the *tsv3* mutant seriously affected expressions of some genes  
348 associated with Chl biosynthesis, photosynthesis and chloroplast development (Figure  
349 7A,B,C), whereas the expressions of those affected genes could back to normal level or  
350 slightly higher levels as WT plants at high temperature (32°C) (Figure 8A,B,C). This  
351 discrepancy was attributable to the difference in the chloroplast structure and pigment  
352 contents between 20°C and 32°C. It is clear that malfunction of *TSV3* influences early  
353 chloroplast development under cold stress.

354 Notwithstanding the reason why abnormal chloroplast occurs only in early leaves of  
355 rice under cold stress is not completely claimed yet, it was speculated that the *TSV3*  
356 function is possibly not prerequisite at higher temperatures, but it is essential/more  
357 required for rice chloroplast development during early-leaf development under cold stress.

358 This was plausibly supported by the results from transcriptional analysis (Figure 3B) of  
359 the highly expressed level at 20°C, irrespective of WT or *tsv3* plants, and the no  
360 discrimination between WT and *tsv3* mutant at 32°C. Additionally, under cold stress  
361 (20°C), the decreased level of *FtsZ*, known to involve in the first step of chloroplast  
362 development, might affect the plastid division, which was in aligned with chloroplast  
363 development (data not shown) in mutant.

364

365 **The *TSV3* may regulate biogenesis of chloroplast 50S large ribosomal under cold**  
366 **stress**

367 The chloroplast 50S large subunit consists of three rRNAs (23S, 4.5S, and 5S rRNAs)  
368 and 30S ribosomal proteins, e.g RPL21. Although much work has been undertaken to  
369 elucidate the composition of chloroplast ribosome, the molecular basis of its assembly in  
370 higher plants remains elusive. Previous studies on bacteria showed that the majority of  
371 Obg propeins are associated with the 50S ribosomal subunit, ribosome assembly and  
372 stress responses (Scott et al. 2000; Lin et al. 2004; Wout et al. 2004; Datta et al. 2004;  
373 Jiang et al. 2006; Kuo et al. 2008). In view of the previous results aforementioned, Obgs  
374 homolog *TSV3* possibly have similar functions in higher plants. Except for OCT region,  
375 the *TSV3* homolog in *Arabidopsis*, namely *AtObgC/CPSAR1* (At5g18570), and  
376 *OsObgC1* (LOC\_Os07g47300) in rice, share the similarity in 3D structure (Supplemental  
377 Figure 2). *AtObgC/CPSAR1* was essential for the formation of normal thylakoid  
378 membranes (Garcia et al., 2010) and might play an important role in the biogenesis of  
379 chloroplast ribosomes (Bang et al., 2009). More recently, based on these results from  
380 previous studies on rice *OsObgC1* (LOC\_Os07g47300) and *Arabidopsis AtObgC*  
381 (At5g18570), Bang et al. (2012) reported that plant *ObgC* is light-induced gene and its  
382 protein is translocated into chloroplast and then may be involved in biogenesis of  
383 chloroplast large (50S) ribosomal subunit, which influences the PEP-related plastid gene  
384 transcription, and proposed a hypothetical model of three *ObgC* domains (OCT, *Obg* fold  
385 and G domain), which may mediate the role *ObgC* of chloroplast ppGpp signaling,  
386 association of *ObgC* with 50S ribosomal subunit and may regulate the action of *ObgC*  
387 depending on its GTP-/GDP-bound states, respectively(Supplemental Figure 2).

388 In this study, the transcripts of *Rpl21* and *23SrRNA*, encoding the components of  
389 chloroplast ribosomal large subunit (50S), involved in the ribosome assembly, in the *tsv3*  
390 mutant were seriously affected under 20°C (Figure 7C), but those for *Rps7*, *Rps20* and  
391 *16SrRNA*, all encoding the components of chloroplast ribosomal small (30S) subunit,  
392 seemed to be no significant change at 20°C and 32°C (Figure 7G, Figure 8C).  
393 Additionally, the severely reduced transcription levels of PEP-dependent plastid genes  
394 (*RbcL*, *psaA*, *psbA*) (Figure 7B) suggested that the *tsv3* mutation affected the  
395 plastid-encoded RNA polymerase transcription, like *AtObgC* (Bang et al. 2012). Hence,  
396 like *AtObgC* (Bang et al. 2012), *TSV3* might be involved in biogenesis of chloroplast  
397 large (50S), not small (30S), ribosomal subunit. Indeed, RNA gel blot analysis showed  
398 that, under only cold stress, the accumulation of the matured 23S rRNA was greatly  
399 reduced in the *tsv3* mutant, but nearly reached WT level at high temperatures  
400 (Supplemental Figure 3). Interestingly, only under cold stress, the *TSV3* affected the 50S  
401 ribosome assembly, in turn, produced the albino phenotype. Accordingly, the loss of  
402 *TSV3*-mediated *Rpl21-23S rRNA* mRNA regulation might produce thermo-sensitive  
403 virescent phenotype under cold stress.

404 Nevertheless, irrespective of low or high temperatures, another *TSV3* homolog,  
405 *OsObgC1* (*LOC\_Os07g47300*), null mutants (*obgc1-d1* and *obgc1-t*) and *OsObgC1*  
406 knockdown (*obgc1-d2*) mutant in rice were reported to severe or partially chlorotic  
407 phenotype during early leaf development like *AtObgC* RNAi *Arabidopsis* lines exhibiting  
408 chlorotic phenotypes (Bang et al. 2012). Additionally, the mutation of *OsObgC1* has little  
409 effect on the expression of other rice *Obg* homologs such as *OsObgC2/TSV3* and  
410 *OsObgM* (Bang et al. 2009). In addition to its structural similarity to both *OsObgM* and  
411 *AtObgM* in mitochondria, the obvious differences both in OCT regions (Supplemental  
412 Figure 2) and in sub-branch (Figure 4B) between *TSV3* and *AtObgC1/OsObgC1* strongly  
413 supported the existence of the difference in response to environment changes (e.g.  
414 temperature/light) and regulating pathways. The findings highlighted the notion that even  
415 highly conserved genes within the same or across species might play diverse and complex  
416 roles than previously recognized. Also, our observations provided the evidence of

417 versatile roles for plant ObgCs in development. Taken together, *TSV3* is required for  
418 chloroplast development during the early leaf stage under cold stress.

419

#### 420 ***TSV3* may be important for recovery from cold stress**

421 In this study, the *tsv3* mutant is a typical thermo-sensitive virescent mutant, similar to the  
422 previously described thermo-sensitive virescent /albino rice mutants such as *v1* (Kusumi  
423 et al. 1997), *v2* (Sugimoto et al. 2004 and 2007), *v3* and *st1* (Yoo et al. 2009), *wlp1* (Song  
424 et al. 2014), *osv4* (Gong et al. 2014) and *tcd9* (Jiang et al., 2014). Despite the similar  
425 phenotypes in *v1*, *v2*, *v3*, *st1*, *wlp1*, *osv4* and *tcd9* mutants, the mechanisms and  
426 regulations affecting the chloroplast development are possibly different. Briefly, the  
427 *VI(NUS1)* encoding chloroplast-localized protein NUS1 regulates ribosomal RNA  
428 transcription under low temperature (Kusumi et al. 2011) and the *v1* mutation severely  
429 blocks the accumulation of PEP subunits (Kusumi et al. 2004). The *V2*, which encodes  
430 plastid/mitochondrial guanylate kinase (pt/mt GK), regulates guanine nucleotide pools  
431 (Sugimoto et al. 2007) under low temperature and the *v2* mutation blocks the formation of  
432 functional PEP (Sugimoto et al. 2004). The *V3* and *St1*, encoding the large and small  
433 subunits of ribonucleotide reductase (RNR) respectively, are required for chloroplast  
434 biogenesis during early leaf development and the *v3* and *st1* mutants withered to death at  
435 approximately 30 d after germination under 20°C conditions (Yoo et al. 2009). In *wlp1*  
436 mutant, the mutation of the rice large subunit protein L13 lead to abnormal chloroplast  
437 development under only cold stress (Song et al. 2014). Additionally, the mutation of rice  
438 *TCD9*, encoding  $\alpha$  subunit of chaperonin protein 60 (Cpn60 $\alpha$ ), hinders *FtsZ*  
439 transcription/translation, in turn, influences plastid division and finally leads to abnormal  
440 chloroplasts under cold stress (Jiang et al. 2014). The mutation of *OsV4*, encoding a novel  
441 chloroplast-targeted PPR protein, leads the dramatically reduced transcriptions of some  
442 ribosomal components and PEP-dependent genes under cold stress (Gong et al. 2014).

443 Obviously, the loss of *TSV3* function produced low-temperature virescent phenotype  
444 before 4-leaf stage, indicating that *TSV3* was involved in a pathway that may be only  
445 required under cold stress. This was strongly supported by the highly expressed level at  
446 20°C, regardless of WT or mutant (Figure 3B). It has been reported that cold stress



447 interfered with protein biosynthesis in plastids by delaying translational elongation  
448 (Grennan and Ort 2007), and virescence/thermo-sensitivity played a role in protection  
449 from photo-oxidative damage before healthy chloroplasts were developed (Zhou et al.  
450 2009). Previous reports also confirmed that the deficiency of plastid translation often led  
451 to a cold sensitive phenotype (Tokuhisa et al. 1998; Ahlert et al. 2003; Rogalski et al.  
452 2008; Liu et al. 2010). Taken together, *TSV3* might be involved in a protection  
453 mechanism under cold stress and the reduction of *TSV3* would lead to a cold-sensitive  
454 chloroplast deficiency.

455 In conclusion, our data clearly indicated that *TSV3* was fundamentally involved in the  
456 biogenesis of plastid ribosomes under cold stress during chloroplast development in early  
457 leaves and a hypothetical model for *TSV3* function was shown in Figure 9. In this model,  
458 under cold-induced conditions, *TSV3* was translocated into chloroplast to interact with  
459 the chloroplast ribosome 50S to produce active PEP capable of transcribing  
460 photosynthetic or some housekeeping genes, unlike *AtObgC/OsObgC1* which is  
461 translocated into chloroplast under light-induced conditions (Bang et al. 2012). It merits  
462 further investigation in the extent of *TSV3* function variation, which might control  
463 expression of active PEP, according to cell type, developmental stage or environmental  
464 conditions.

465

466

#### 467 **ACKNOWLEDGMENTS**

468 We sincerely thank Dr. Youbin Xiang (Stowers Institute for Medical Research, USA) for  
469 her critical reading of and suggestions for our manuscript. We are grateful to Prof.  
470 Zhongnan Yang for kindly providing pMON530-GFP vector and for his constructive  
471 comments and suggestions on this paper as well. The project was financially supported by the  
472 Natural Science Foundation of China (No. 30971552), Minister of Science and Technology of  
473 China (MOST) (2016YFD0100902), the Shanghai Municipal Science and Technology  
474 Commission (16ZR14253000 and 16391900700), and Innovation Program of Shanghai  
475 Municipal Education Commission (2017-01-07-00-02-E00039).

476



477

478

479 **LITERATURE CITED**

- 480 1. Ahlert, D., S Ruf, and R. Bock, 2003 Plastid protein synthesis is required for plant  
481 development in tobacco. *Proc. Natl. Acad. Sci. USA* 100:15730-15735.
- 482 2. Arnon, D.I., 1949 Copper enzymes in isolated chloroplasts. *Plant Physiol* 24: 1-15.
- 483 3. Bang, W.Y., A. Hata, I.S. Jeong, T. Umeda, T. Masuda *et al.*, 2009 AtObgC, a plant  
484 ortholog of bacterial Obg, is a chloroplast-targeting GTPase essential for early  
485 embryogenesis. *Plant Mol. Biol.* 71: 379–390.
- 486 4. Woo, Y.B., J. Chen, I.S. Jeong, S.W. Kim, C.V. Kim *et al.*, 2012 Functional  
487 characterization of ObgC in ribosome biogenesis during chloroplast development.  
488 *Plant J* 171:122-134.
- 489 5. Bourne, H.R., D.A. Sanders, and F. McCormick, 1990 The GTPase superfamily: a  
490 conserved switch for diverse cell functions. *Nature* 348:125–132.
- 491 6. Buglino, J., V. Shen, P. Hakimian, and C.D. Lima, 2002 Structural and biochemical  
492 analysis of the Obg GTP binding protein. *Structure* 10:1581–1592.
- 493 7. Datta, K., J.M. Skidmore, K. Pu, and J.R. Maddock, 2004 The *Caulobacter*  
494 *crescentus* GTPase CgtAC is required for progression through the cell cycle and for  
495 maintaining 50S ribosomal subunit levels. *Mol Microbiol* 54:1379–1392
- 496 8. Edgar, R.C., 2004 MUSCLE: multiple sequence alignment with high accuracy and  
497 high throughput. *Nucleic acids Res* 32: 1792-1797.
- 498 9. Emanuelsson, O., H. Nielsenb, and S. Brunakb, 2000 Predicting Subcellular  
499 Localization of Proteins Based on their N-terminal Amino Acid Sequence. *J Mol Biol*  
500 300: 1005-1016.
- 501 10. Foti, J.J., J. Schienda, V.A. Suter, and S.T. Lovett, 2005 A bacterial G  
502 protein-mediated response to replication arrest. *Mol Cell* 17:549–560.
- 503 11. Garcia, C., N. Khan, U. Nannmark, and H. Aronsson, 2010 The chloroplast protein  
504 CPSAR1, dually localized in the stroma and the inner envelope membrane, is  
505 involved in thylakoid biogenesis. *Plant J.* 63, 73–85.
- 506 12. Goff, S.A., D. Rieke, T.H. Lan, G. Presting, R. Wang *et al.*, 2002 A draft sequence of

- 507 the rice genome (*Oryza sativa* L. ssp. *japonica*). *Science* 296: 92-100.
- 508 13. Gong, X.D., Q. Jiang, J.L Xu, J.H. Zhang, S. Teng *et al.*, 2013 Disruption of the rice  
509 plastid ribosomal protein S20 leads to chloroplast developmental defects and  
510 seedling lethality. *G3: Genes| Genomes| Genetics* 3:1769-1777.
- 511 14. Gong, X.D., Q.Q. Su, D.Z. Lin, Q. Jiang Q, J.L. Xu *et al.*, 2014 The Rice *OsV4*  
512 Encoding a novel pentatricopeptide repeat protein is required for chloroplast  
513 development during the early leaf stage under cold stress. *Journal of Integrative Plant*  
514 *Biology* 56(4): 400–410.
- 515 15. Grennan, A.K., and D.R. Ort, 2007 Cool temperatures interfere with D1 synthesis in  
516 tomato by causing ribosomal pausing. *Photosynth. Res.* 94: 375–385.
- 517 16. Hajdukiewicz, P.T., L.A. Allison, and P. Maliga, 1997 The two plastid RNA  
518 polymerases encoded by the nuclear and plastid compartments transcribe distinct  
519 groups of genes in tobacco. *EMBO J.* 16: 4041-4048.
- 520 17. Hall, T.A., 1999 BioEdit: a user-friendly biological sequence alignment editor and  
521 analysis program for Windows 95/98/NT. *Nucleic Acids Symp Ser* 41: 95-98.
- 522 18. Hiei, Y., S. Ohta, T. Komari, and T. Kumashiro, 1994 Efficient transformation of  
523 rice (*Oryza sativa* L.) mediated by *Agrobacterium* and sequence analysis of the  
524 boundaries of the T-DNA. *Plant J* 6: 271-282.
- 525 19. Hiratsuka, J., H. Shimada, R. Whittier, T. Ishibashi, and M. Sakamoto, 1989 The  
526 complete sequence of the rice (*Oryza sativa*) chloroplast genome: intermolecular  
527 recombination between distinct tRNA genes accounts for a major plastid DNA  
528 inversion during the evolution of the cereals. *Mol Gen Genet* 217: 185-194.
- 529 20. Jiang, M., K. Datta, A. Walker, J. Strahler, P. Bagamasbad *et al.*, 2006 The  
530 *Escherichia coli* GTPase CgtAE is involved in late steps of large ribosome assembly.  
531 *J Bacteriol* 188:6757–6770.
- 532 21. Jiang, Q., J. Mei, X.D. Gong, J.L.Xu, J.H. Zhang *et al.*, 2014 Importance of the rice  
533 *TCD9* encoding  $\alpha$  subunit of chaperonin protein60 (Cpn60 $\alpha$ ) for the chloroplast  
534 development during the early leaf stage. *Plant Science* (215–216): 172-179.
- 535 22. Kobayashi, G, S. Moriya, and C. Wada, 2001 Deficiency of essential GTP-binding  
536 protein ObgE in *Escherichia coli* inhibits chromosome partition. *Mol Microbiol*

- 537 41:1037-1051.
- 538 23. Kusumi, K., A. Mizutani, M. Nishimura, and K. Iba, 1997 A virescent gene *VI*  
539 determines the expression timing of plastid genes for transcription/translation  
540 apparatus during early leaf development in rice. *Plant J.* 12:1241–1250.
- 541 24. Kusumi, K., C. Sakata, T. Nakamura, and S. Kawasaki, 2011 A plastid protein NUS1  
542 is essential for build-up of the genetic system for early chloroplast development  
543 under cold stress conditions. *Plant J.* 68:1039–1050.
- 544 25. Kusumi K, Yara A, Mitsui N, Tozawa Y, Iba K (2004) Characterization of a Rice  
545 Nuclear-Encoded Plastid RNA Polymerase Gene *OsRpoTp*. *Plant Cell Physiol.* 45,  
546 1194-1201.
- 547 26. Kuo, S., B. Demeler, and W.G. Haldenwang, 2008 The growth-promoting and stress  
548 response activities of the *Bacillus subtilis* GTP binding protein Obg are separable by  
549 mutation? *J. Bacteriol.* 190:6625–6635.
- 550 27. Kukimoto-Niino, M., K. Murayama, M. Inoue, T. Terada, and J Tame *et al.*, 2004  
551 Crystal structure of the GTP-binding protein Obg from *Thermus thermophilus* HB8.  
552 *J Mol Biol* 337:761–770.
- 553 28. Kyojuka, J., D. McElroy, T. Hayakawa, Y. Xie, R.Wu *et al.*, 1993 Light-regulated  
554 and cell-specific expression of tomato *rbcS-gusA* and rice *rbcS-gusA* fusion genes in  
555 transgenic rice. *Plant Physiol* 102: 991-1000.
- 556 29. Leister, D., 2003 Chloroplast research in the genomic age. *Trends Genet* 19: 47-56.
- 557 30. Lin, B., D.A. Thayer, and J.R. Maddock, 2004 The *Caulobacter crescentus* CgtAC  
558 protein cosediments with the free 50S ribosomal subunit. *J Bacteriol* 186:481–489.
- 559 31. Liu, X., S.R. Rodermel, and F. Yu, 2010 A *var2* leaf variegation suppressor locus,  
560 *SUPPRESSOR OF VARIATION3*, encodes a putative chloroplast translation  
561 elongation factor that is important for chloroplast development in the cold. *BMC*  
562 *Plant Biol.* 10, 287.
- 563 32. Livak, K.J., and T.D. Schmittgen, 2001 Analysis of relative gene expression data  
564 using real-time quantitative PCR and the method. *Methods* 25:402–408.
- 565 33. Maddock, J., A. Bhatt, M. Koch, and J. Skidmore, 1997 Identification of an essential  
566 *Caulobacter crescentus* gene encoding a member of the Obg family of GTP-binding

- 567 proteins. *J Bacteriol* 179:6426–6431.
- 568 34. Mandel, M.A., K.A. Feldmann, E.L. Herrera, S.M. Rocha, and P. León, 1996 *CLA1*,  
569 a novel gene required for chloroplast development, is highly conserved in evolution.  
570 *Plant J.* 9: 649-658.
- 571 35. Michel, B., 2005 Obg/CtgA, a signaling protein that controls replication, translation,  
572 and morphological development? *Dev Cell* 8:300–301.
- 573 36. Mullet, J.E., 1993 Dynamic regulation of chloroplast transcription. *Plant Physiol.* 103:  
574 309–313.
- 575 37. Murray, M. G., and W.F. Thompson, 1980. Rapid isolation of high molecular weight  
576 plant DNA. *Nucleic acids research*, 8(19): 4321-4326.
- 577 38. Okamoto, S., and K. Ochi, 1998 An essential GTP-binding protein functions as a  
578 regulator for differentiation in *Streptomyces coelicolor*. *Mol Microbiol* 30:107–119.
- 579 39. Pfalz, J., and T. Pfannschmidt, 2012 Essential nucleoid proteins in early chloroplast  
580 development. *Trends Plant Sci* 18:186-194.
- 581 40. Rogalski, M., M.A. Schottler, W. Thiele, W.X. Schulze, and R. Bock, 2008 Rpl33, a  
582 nonessential plastid-encoded ribosomal protein in tobacco, is required under cold  
583 stress conditions. *Plant Cell* 20, 2221–2237.
- 584 41. Sachetto-Martins, G, L.O. Franco, and D.E. De Oliveira, 2000 Plant glycine-rich  
585 proteins: a family or just proteins with a common motif? *Biochim Biophys Acta* 1492:  
586 1-14.
- 587 42. Santis-Maciossek, D.G., W. Kofer, A. Bock, S. Schoch, R.M. Maier *et al.*, 1999  
588 Targeted disruption of the plastid RNA polymerase genes *rpoA*, B and C1: molecular  
589 biology, biochemistry and ultrastructure. *Plant J* 18: 477-489.
- 590 43. Scott, J.M., J. Ju, T. Mitchell, and W.G Haldenwang, 2000 The *Bacillus subtilis* GTP  
591 binding protein Obg and regulators of the  $\sigma$ B stress response transcription factor  
592 cofractionate with ribosomes. *J Bacteriol* 182:2771–2777.
- 593 44. Shepherd, P.R., G. Salvesen, A. Toker, S.V. Graham, S. Roberts *et al.*, 2002 Impaired  
594 chromosome partitioning and synchronization of DNA replication initiation in an  
595 insertional mutant in the *Vibrio harveyi* *cgtA* gene coding for a common  
596 GTP-binding protein. *Biochem J* 362:579–584.

- 597 45. Song, J., X.G. Wei, G.S. Shao, Z.H. Sheng, D.B. Chen *et al.*, 2014 The rice  
598 nuclear gene *WLPI* encoding a chloroplast ribosome L13 protein is needed for  
599 chloroplast development in rice grown under low temperature conditions *Plant Mol*  
600 *Biol* 84:301–314
- 601 46. Sugimoto, H., K. Kusumi, K. Noguchi, M. Yano, A. Yoshimura *et al.*, 2007 The rice  
602 nuclear gene, *VIRESCENT 2*, is essential for chloroplast development and encodes a  
603 novel type of guanylate kinase targeted to plastids and mitochondria. *Plant J* 52:  
604 512–527.
- 605 47. Sugimoto, H., K. Kusumi, Y. Tozawa, J. Yazaki, N. Kishimoto *et al.*, 2004 The  
606 *virescent-2* mutation inhibits translation of plastid transcripts for the plastid genetic  
607 system at an early stage of chloroplast differentiation. *Plant Cell Physiol*.  
608 45:985–996.
- 609 48. Takeuchi, R., S. Kimura, A. Saotome, and K. Sakaguchi, 2007 Biochemical  
610 properties of a plastidial DNA polymerase of rice. *Plant Mol Biol* 64: 601-611.
- 611 49. Tamura, K., D. Peterson, N. Peterson, G. Stecher, M. Nei *et al.*, 2011 MEGA5:  
612 molecular evolutionary genetics analysis using maximum likelihood, evolutionary  
613 distance, and maximum parsimony methods. *Mol Biol Evol* 28: 2731-2739.
- 614 50. Tokuhisa, J.G., P. Vijayan, K.A. Feldmann, and J.A. Browse, 1998 Chloroplast  
615 development at low temperatures requires a homolog of DIM1, a yeast gene  
616 encoding the 18S rRNA dimethylase. *Plant Cell* 10, 699–711.
- 617 51. Trach, K. and J.A. Hoch, 1989 The *Bacillus subtilis* spo0B stage0 sporulation operon  
618 encodes an essential GTP-binding protein. *J. Bacteriol.* 171:1362–1371.
- 619 52. Vitha, S., R.S. McAndrew, and K.W. Osteryoung, 2001 FtsZ ring formation at the  
620 chloroplast division site in plants. *J Cell Biol* 153: 111-120.
- 621 53. Wellburn, A.R., 1994 The spectral determination of chlorophylls a and b, as well as  
622 total carotenoids, using various solvents with spectrophotometers of different  
623 resolution. *J Plant Physiol* 144: 307-313.
- 624 54. Wout, P., K. Pu, S.M. Sullivan, V. Reese, S. Zhou *et al.*, 2004 The *Escherichia coli*  
625 GTPase CgtAE cofractionates with the 50S ribosomal subunit and interacts with  
626 SpoT, a ppGpp synthetase/hydrolase. *J Bacteriol* 186:5249–5257.

- 627 55. Wu, Z.M., X. Zhang, B. He., L. Diao, S. Sheng *et al.*, 2007 A chlorophyll-deficient  
628 rice mutant with impaired chlorophyllide esterification in chlorophyll biosynthesis.  
629 *Plant Physiol* 145: 29-40.
- 630 56. Yoo, S.C., S.H. Cho, H. Sugimoto, J. Li , K. Kusumi *et al.*, 2009 Rice *Virescent3* and  
631 *Stripe1* encoding the large and small subunits of ribonucleotide reductase are  
632 required for chloroplast biogenesis during early leaf development. *Plant Physiol.* 150:  
633 388–401.
- 634 57. Yu, J., S. Hu, J. Wang, G.K.Wong, S. Li et al., 2002 A draft sequence of the rice  
635 genome (*Oryza sativa* L. Ssp. *indica*). *Science* 296, 79–92.
- 636 58. Zhou, W., Y. Cheng, A. Yap, A.L. Chateigner-Boutin, E. Delannoy *et al.*, 2009 The  
637 *Arabidopsis* gene *YS1* encoding a DYW protein is required for editing of *rpoB*  
638 transcripts and the rapid development of chloroplasts during early growth. *Plant J.* 58:  
639 82–96.
- 640
- 641

## Figure legends

**Figure 1** Characterization of the *tsv3* mutants. **A** 2-, 3- and 4-leaf stage plants of wild type (WT, Jiahua1, *left*) and *tsv3* mutant (*right*) at 20°C. **B** 2-, 3- and 4-leaf stage plants of WT (*left*) and *tsv3* mutant (*right*) at 32°C. **C** 3-leaf-stage-seedlings for WT(*left*) and *tsv3* mutant(*right*) grown at 20°C, respectively. **D, E** The pigment contents of the 3<sup>rd</sup> leaves at 3-leaf stage at 20°C and 32°C for WT and *tsv3* mutant.

**Figure 2** Transmission electron microscopic images of chloroplasts in WT and *tsv3* mutant at 20°C and 32°C. **A**, Intact chloroplast in the WT cell at 32°C. **B** Intact chloroplast in the *tsv3* mutant cell at 32°C. **C** Intact chloroplast in the WT cell at 20°C. **D** Abnormal chloroplast in the *tsv3* mutant cell at 20°C. G, grana stacks; V, vacuole

**Figure 3** Genetic analysis and cloning of the *TSV3* gene. **A** Genetic mapping of the *TSV3* gene. **B** Transcript levels of *TSV3* (*LOC\_Os03g58540*) in mutant and WT at the 3-leaf stage under different temperatures by qPCR. **C** The T<sub>1</sub> segregation from transgenic T<sub>0</sub> plants transformed with pCAMBIA1301-TSV3 at 20°C. The genotypes of green phenotype are *TSV3:TSV3/TSV3: tsv3* (*left*) and the genotype of the albino phenotype is *tsv3:tsv3* (*right*). OsActin was used as a control for qPCR.

**Figure 4** Phylogenic analysis of TSV3. **A** Amino acid sequence alignment of TSV3 with the four homologous proteins from Amino acids fully or partially conserved are shaded black and gray, respectively. **B** Phylogenic tree of TSV3 and homologous proteins. The rooted tree is based on a multiple sequence alignment generated with the program Mega5.2. Scale represents percentage substitution per site. Statistical support for the nodes is indicated.

**Figure 5** Subcellular localization of TSV3 protein. **A** Empty GFP vector without a specific targeting sequence. **B** TSV3 -GFP fusion. The scale bar represents 20 μm.

**Figure 6** Expression analysis of *TSV3* by RT-PCR analysis. **A** Analysis of expression of *TSV3* in different tissues by RT-PCR. GB, Germinating bud; YR, young-seedling roots; YS, young-seedling stem; YL, young-seedling leaf; FL, flag leaf at heading; YP, young panicles. *OsActin* was used as a control (cycle number for *OsActin* was 28, cycle number for *TSV3* was 35). **B** Transcript levels of *TSV3* in top leaves sampled from the plumule, 2-, 3-, 4- and 5-leaf stages. The *TSV3* transcript level in the top leaves at the 2-leaf stage was set to 1.0, and the relative values in other treatments were calculated accordingly. *OsActin* was used as a control (Cycle number of *OsActin* is 28, cycle number of *TSV3* is 31).

**Figure 7** qPCR analysis of those genes related to Chl biosynthesis, photosynthesis and chloroplast development in mutant at 20°C. **A, B, C** Expression levels of genes related to Chl biosynthesis, photosynthesis and chloroplast development in WT and the *tsv3* mutant in the 3<sup>rd</sup> leaves, respectively. The relative expression level of each gene in WT and mutant was analyzed by qPCR and normalized using the *OsActin* as an internal control. Data are means±SD (n = 3).

**Figure 8** qPCR analysis of those genes related to Chl biosynthesis, photosynthesis and chloroplast development in mutant at 32°C. **A, B, C** Expression levels of genes related to Chl biosynthesis, photosynthesis and chloroplast development in WT and the *tsv3* mutant in the 3<sup>rd</sup> leaves, respectively. The relative expression level of each gene in WT and mutant was analyzed by qPCR and normalized using the *OsActin* as an internal control. Data are means±SD (n = 3).

**Figure 9** A functional model of *AtObgC* in *Arabidopsis* (Bang et al.2012) and the possible model of *TSV3* in developing chloroplast. Two types of RNA polymerases (NEP and PEP) have been identified in higher plant chloroplasts. *TSV3* interacts with the rice chloroplast 50S ribosome subunit, which functions in the translation of protein encoded by the chloroplast gene and also regulates the transcription of photosynthetic or some housekeeping genes by impacting PEP synthesis. In the absence of *TSV3*, PEP activity stays low, which couples biosynthesis of chlorophyll and proteins, is significantly reduced



at the seedling stage under cold stress, leading to the virescent phenotype.

**Supplemental Figure 1** Characters of the *tsv3* mutants and WT plants grown in fields (2010, Shanghai, China). **A** Changes of plant height from transplanting to heading. **B** Comparison of three yield-related traits between WT and *tsv3* mutant. WT, wide type; PN, panicle number per plant; GW: 1000-grain weight (g); GN, grains per panicle

**Supplemental Figure 2** Predicted 3D structure of TSV3 and homologous proteins. Data predicted by using the Phyre 2 server (<http://www.sbg.bio.ic.ac.uk/phyre2/html/page.cgi?id=index>) and functional mode of three Obgc domains in AtObgC were cited from Bang et al.(2012).

**Supplemental Figure 3** Expression patterns of *TSV3(LOC\_Os03g58540)*. Data were cited from the rice expression profile database, RiceXPro (<http://ricexpro.dna.affrc.go.jp/category-select.php>).

**Supplemental Figure 4** RNA blot analysis of accumulation of chloroplast 23S ribosomal RNA. Five micrograms of total RNA from wild-type and *tsv3* 3-leaf-stage seedlings grown at 20°C and 32 °C was extracted. RNA gel blot analysis was performed as described previously (Chi et al., 2014, published in *The Plant Cell*, Vol. 26: 4918-4932). In addition, the 25S rRNA stained with ethidium bromide (EtBr) is shown as a loading control.

#### **Table legends**

**Supplemental Table 1** The PCR-based molecular markers designed for fine mapping

**Supplemental Table 2** Markers designed for realtime RT-PCR

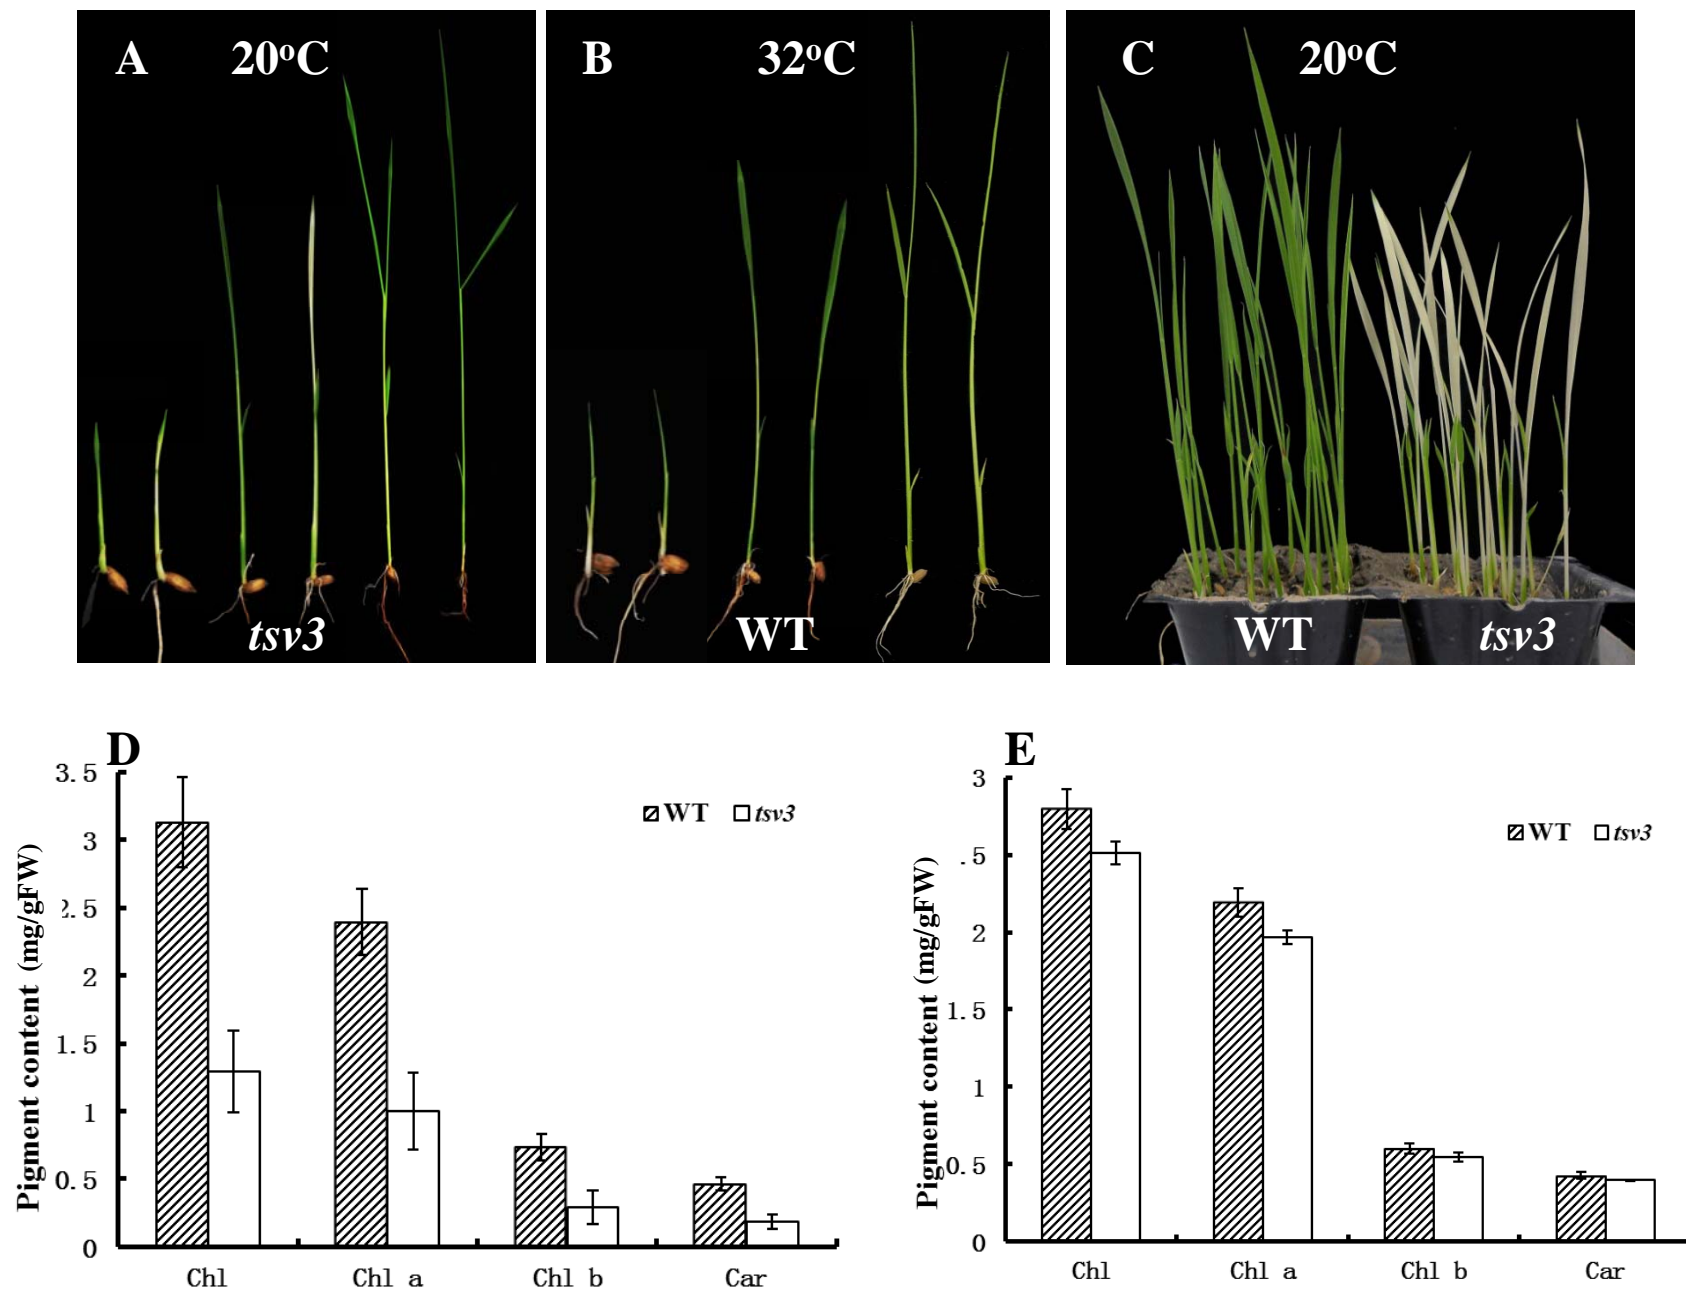

Fig1

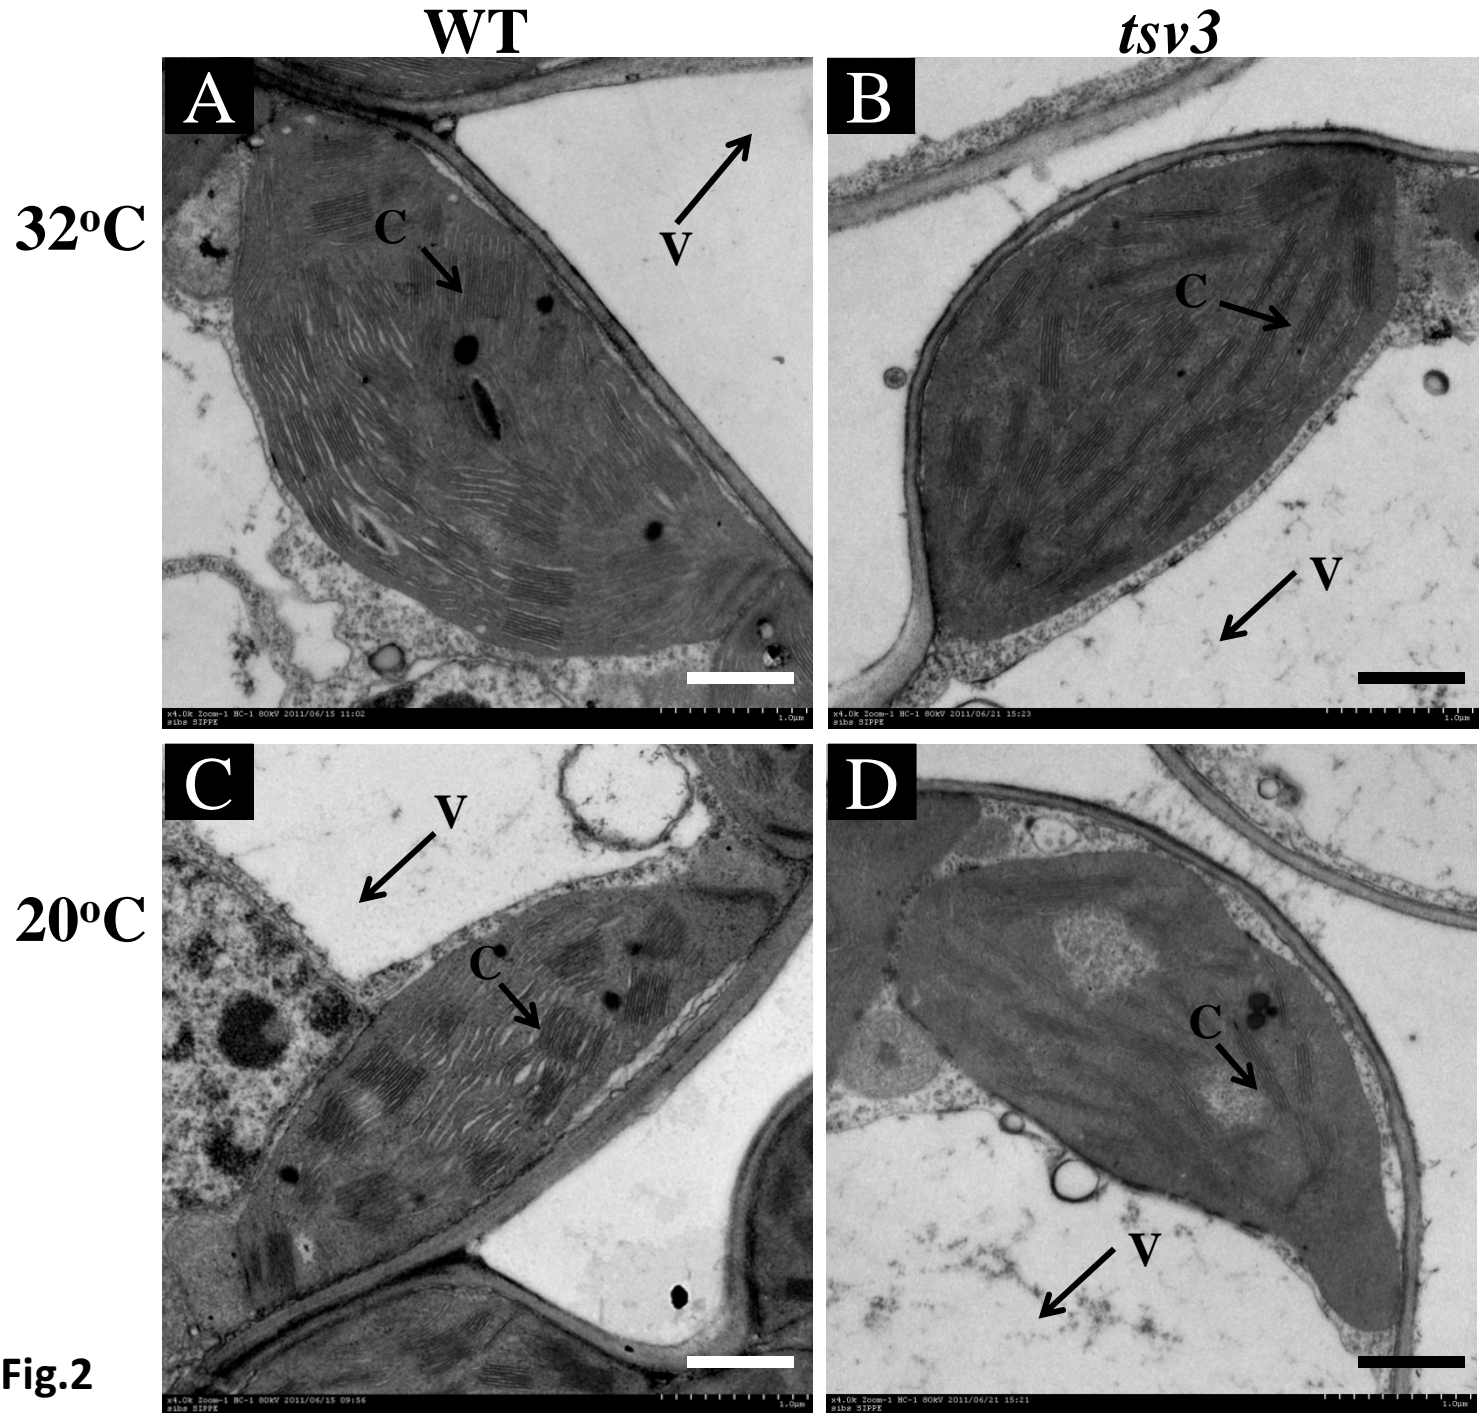

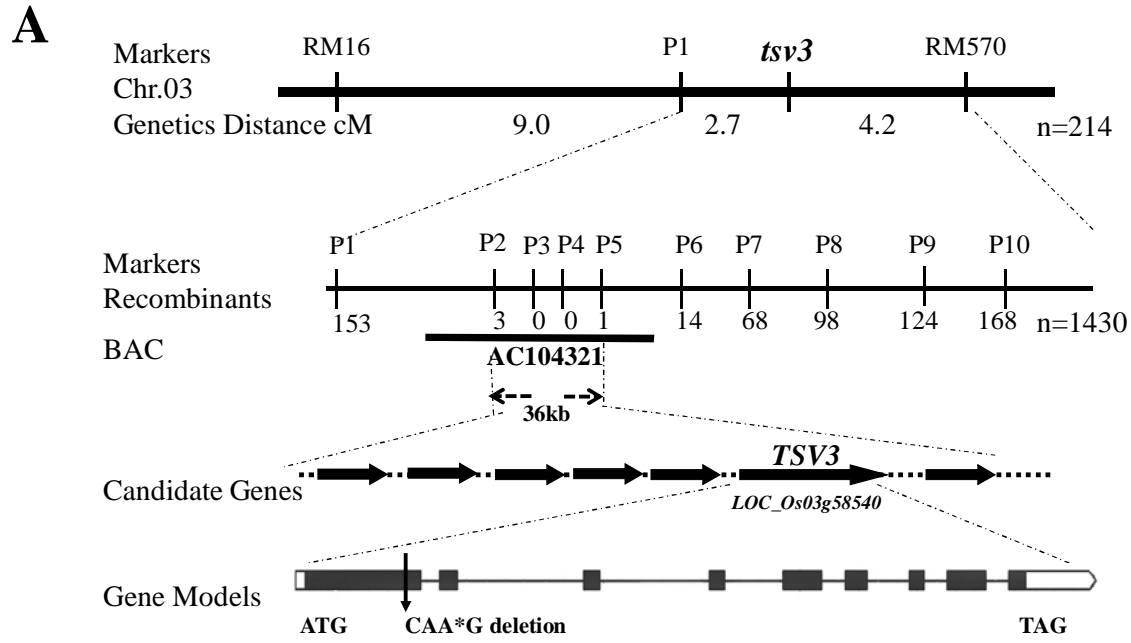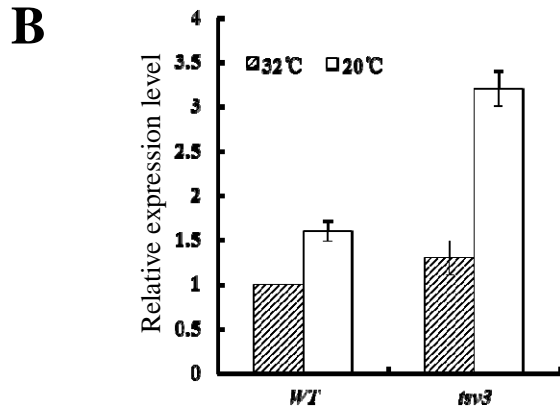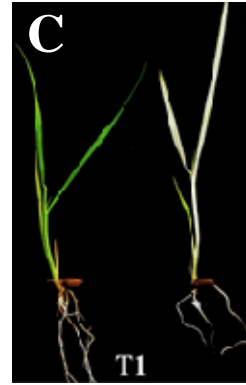

Fig3

**A**

|              |                                                                                       |     |
|--------------|---------------------------------------------------------------------------------------|-----|
| Maize        | ... MALLHPRLPSHPFRAAAHHHHAI SDAS CFLTLHGPGRKRRMLAAVTCRAARVKEPAPSAGASPPPPQALIKEA       | 76  |
| Sorghum      | ... MALLHPRLPSHPLRAAAHHHHAI SDAS CVLTLPGPGRKRTLL AAVTCCAARVKEPAPSAGALPPPPQALIKEA      | 74  |
| Rice         | ... MPELLLHPFPSSHAACAHRAS . AAHRDARPALRLPELHATRRRRNNVACRATRAEAPPCCQNTAAALSKEA         | 72  |
| Brachypodium | NATLLPSHAASHRRVIFSGLNQPPDLLGSLRAESRRQRHP I AVECRATTRAKEPAATSAGAAAPQ... ALAKEA         | 76  |
| Soybean      | ... NVSITSSFN I QLLHETRFSPFFLLPRHRSVQFHHTRRNFVNYKRRTARCQVTSALASITLSTSL... AKRF        | 69  |
|              |                                                                                       |     |
| Maize        | HKYFDHAVVTVRAGDGGHGAVALMPAPSADAARPC... RFNRCGRSS... KKVSYKRNIEGSALEP... GGHGGDVMV     | 148 |
| Sorghum      | HKYFDHAVVTVRAGDGGHGAVALMPAPSADAARPC... RFNRCGRSS... KKVSYKRNIEGSALEP... GGHGGDVMV     | 146 |
| Rice         | HKYFDHAVVTVRAGDGGHGAVALMPAPSADAARPC... RRS DKGKRS... KKVSYKRNIEGSALEP... GGHGGDVMV    | 146 |
| Brachypodium | HKYFDHAVVTVRAGDGGHGAVALMPAPSADAARPC... RRS DKGKRS... KKVSYKRNIEGSALEP... GGHGGDVMV    | 156 |
| Soybean      | HKYFDLVTITVRS... CDGGHGAVAL... EQC... KTKL... K... KR... EG... LL... GGHGGDVMV        | 134 |
|              |                                                                                       |     |
| Maize        | YADEAEETLLRFFBKARYCAKRCGNVGAAGCTLSSRMNSCHAGETLRI PVPVGTVVKRKKCAVLADLAHQDEVLVARGG      | 228 |
| Sorghum      | YADEAEETLLRFFBKARYCAKRCGNVGAAGCTLSSRMNSCHAGETLRI PVPVGTVVKRKKCAVLADLAHQDEVLVARGG      | 226 |
| Rice         | YADEAEETLLRFFBKARYCAKRCGNVGAAGCTLSSRMNSCHAGETLRI PVPVGTVVKRKKCAVLADLAHQDEVLVARGG      | 225 |
| Brachypodium | YADEAEETLLRFFBKARYCAKRCGNVGAAGCTLSSRMNSCHAGETLRI PVPVGTVVKRKKCAVLADLAHQDEVLVARGG      | 235 |
| Soybean      | YADESKLTLLEFNRSRYHAKRCGNVGAAGCTLSSRMNSCHAGETLRI PVPVGTVVKRKKCAVLADLAHQDEVLVARGG       | 213 |
|              |                                                                                       |     |
| Maize        | QCGI SLI DPPEYRRKKAVALSPN VRTSDKVLTHGQPCEEVSL ELI LRVVADVGLVGLPNAGKSTLLSAI TLARPDI AD | 308 |
| Sorghum      | QCGI SLI DPPEYRRKKAVALSPN VRTSDKVLTHGQPCEEVSL ELI LRVVADVGLVGLPNAGKSTLLSAI TLARPDI AD | 306 |
| Rice         | QCGI SLI DPPEYRRKKAVALSPN VRTSDKVLTHGQPCEEVSL ELI LRVVADVGLVGLPNAGKSTLLSAI TLARPDI AD | 305 |
| Brachypodium | QCGI SLI DPPEYRRKKAVALSPN VRTSDKVLTHGQPCEEVSL ELI LRVVADVGLVGLPNAGKSTLLSAI TLARPDI AD | 315 |
| Soybean      | QCGI SLI DPPEYRRKKAVALSPN VRTSDKVLTHGQPCEEVSL ELI LRVVADVGLVGLPNAGKSTLLSAI TLARPDI AD | 293 |
|              |                                                                                       |     |
| Maize        | YPFTTLMNLRGLGGDPLGALGQSSSEATLADLPGLI EGAIH GKGLGRNFLRHLRRTRV I VHVVDAAADDPVNDYKI VRE  | 388 |
| Sorghum      | YPFTTLMNLRGLGGDPLGALGQSSSEATLADLPGLI EGAIH GKGLGRNFLRHLRRTRV I VHVVDAAADDPVNDYKI VRE  | 386 |
| Rice         | YPFTTLMNLRGLGGDPLGALGQSSSEATLADLPGLI EGAIH GKGLGRNFLRHLRRTRV I VHVVDAAADDPVNDYKI VRE  | 385 |
| Brachypodium | YPFTTLMNLRGLGGDPLGALGQSSSEATLADLPGLI EGAIH GKGLGRNFLRHLRRTRV I VHVVDAAADDPVNDYKI VRE  | 395 |
| Soybean      | YPFTTLMNLRGLGGDPLGALGQSSSEATLADLPGLI EGAIH GKGLGRNFLRHLRRTRV I VHVVDAAADDPVNDYKI VRE  | 373 |
|              |                                                                                       |     |
| Maize        | ELRYNPFYLERPVYVVLNKI DLPKADRSLALVLEI SSI GCEE GHEQSGSDNLNGRVS DHOVLS EAKAEGVEKELGDY   | 468 |
| Sorghum      | ELRYNPFYLERPVYVVLNKI DLPKADRSLALVLEI SSI GCEE GHDQSGSDNLNGRVS DHOVLS EAKVEGGEKELGDY   | 466 |
| Rice         | ELRYNPFYLERPVYVVLNKI DLPKADRSLALVLEI SSI GCEE CDGNNTS DLSLNGTGEHNTS SETKVEGGEKELGDY   | 465 |
| Brachypodium | ELRYNPFYLERPVYVVLNKI DLPKADRSLALVLEI SSI GCEE VHDKHSNDKI NENLI ENRVED... DDKELGDY     | 470 |
| Soybean      | ELRYNPFYLERPVYVVLNKI DLPKADRSLALVLEI SSI GCEE VHDKHSNDKI NENLI ENRVED... DDKELGDY     | 446 |
|              |                                                                                       |     |
| Maize        | PRPQAVVAASVLRHI GI DEMLKEI RAALRKCEDHRTPEP... .                                       | 507 |
| Sorghum      | PRPQAVVAASVLRHI GI DEMLKEI RAALRKCEDHRTPEP... .                                       | 505 |
| Rice         | PRPQAVVAASVLRHI GI DEMLKEI RAALRKCEDHRTPEP... .                                       | 504 |
| Brachypodium | PRPQAVVAASVLRHI GI DEMLKEI RAALRKCEDHRTPEP... .                                       | 509 |
| Soybean      | PRPLSVVGVSLKGI RI NEMLKEI RAALRKCEDHRTPEP... .                                        | 489 |

**B**

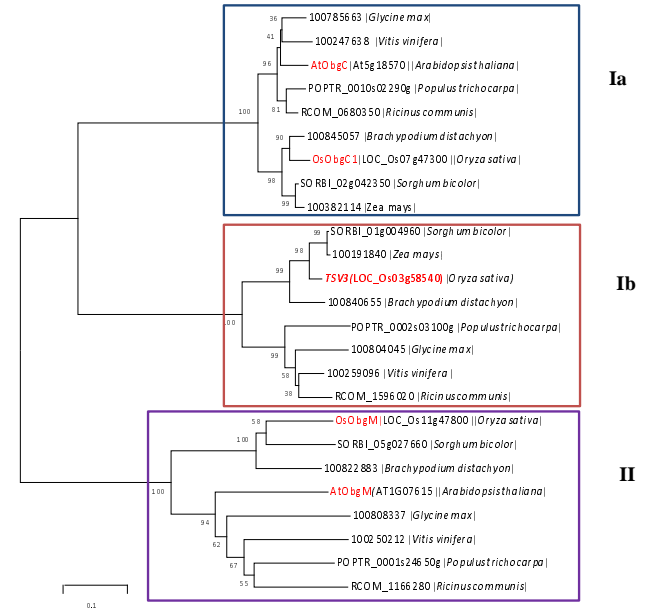

**Fig4**



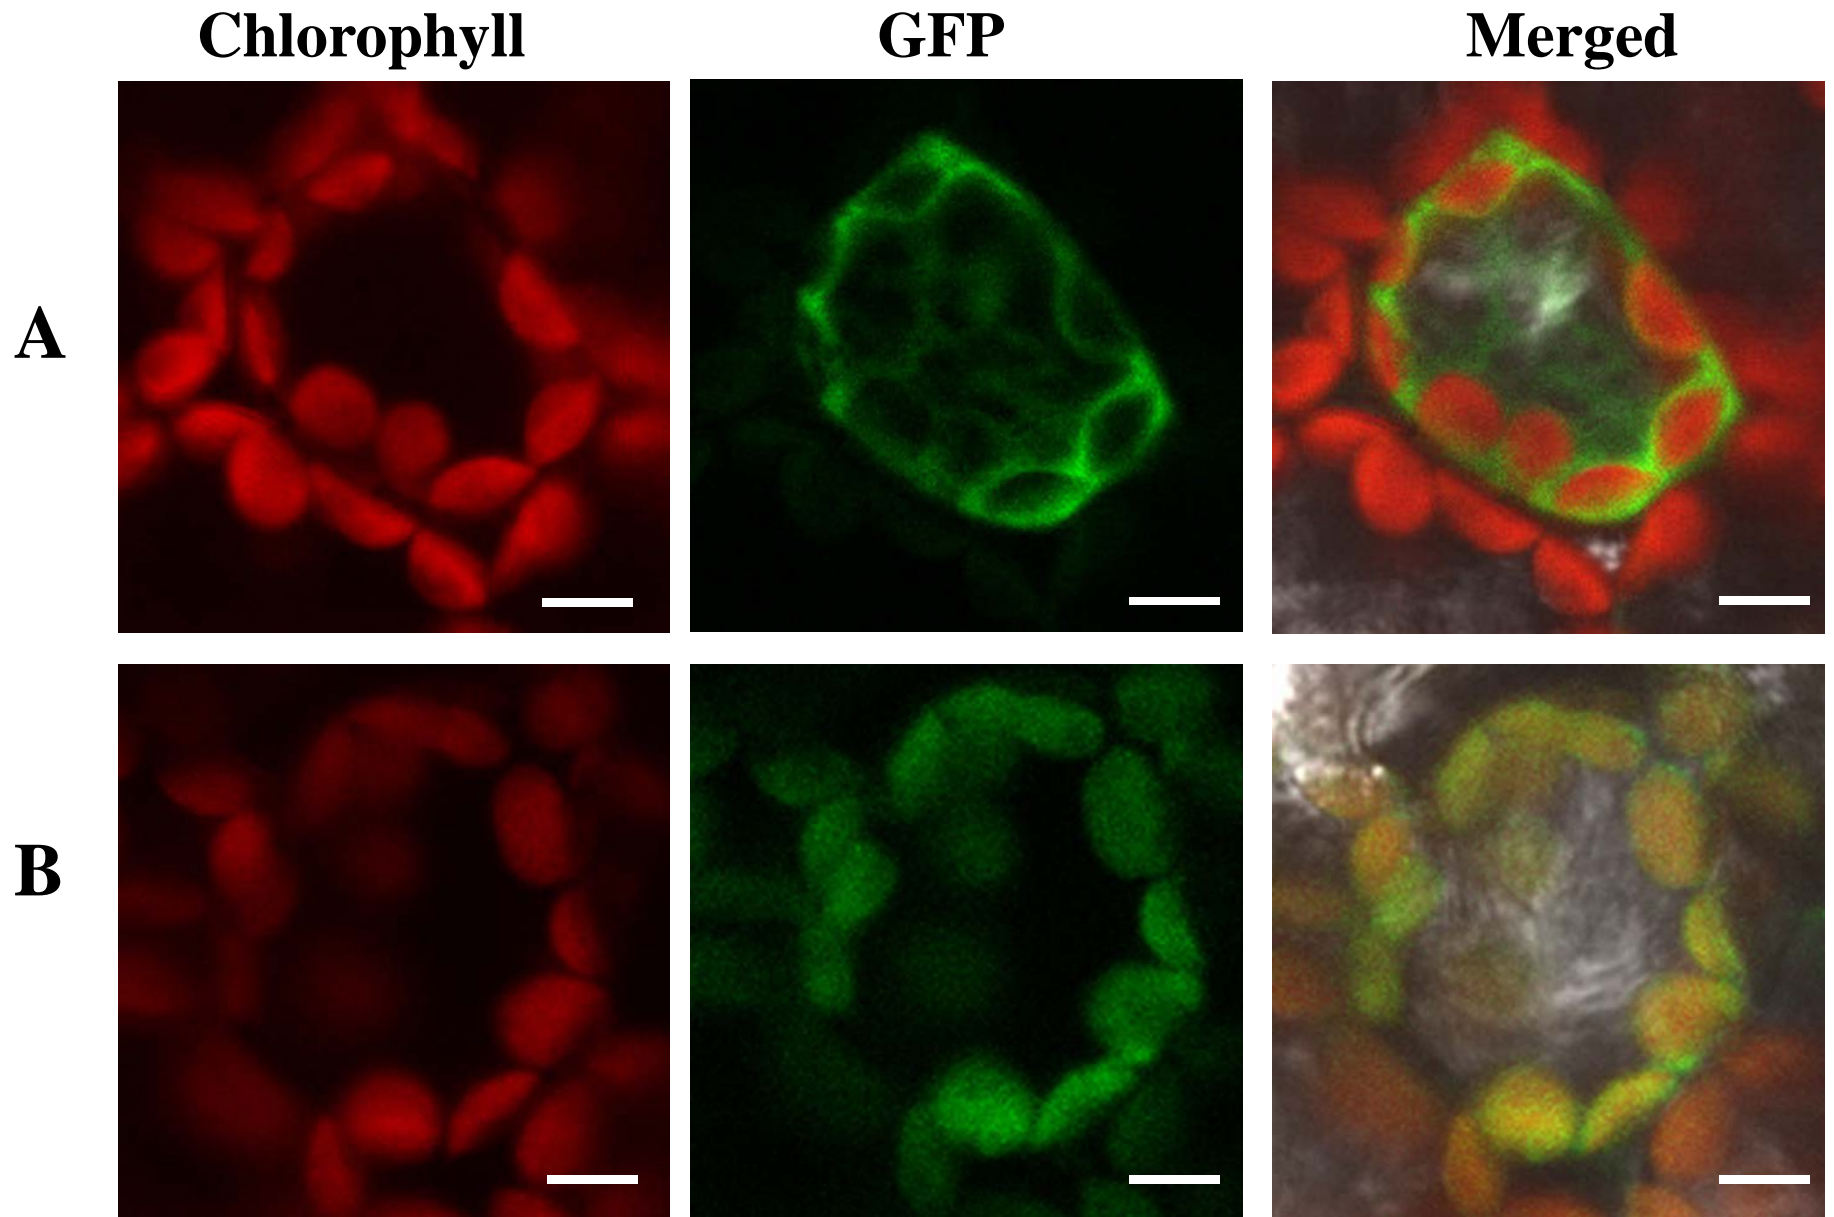

**Fig.5**

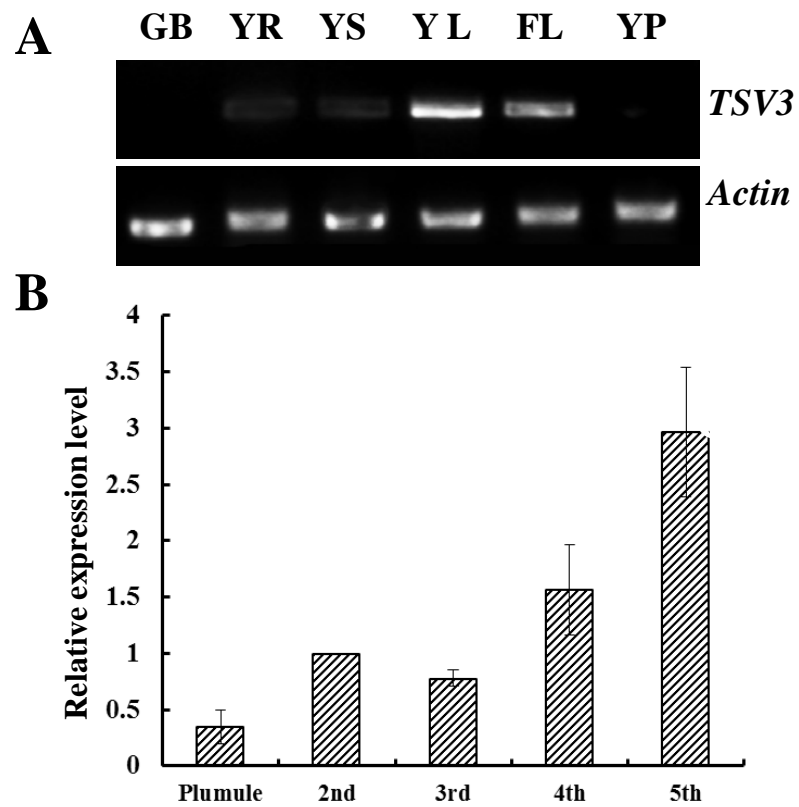

**Fig.6**

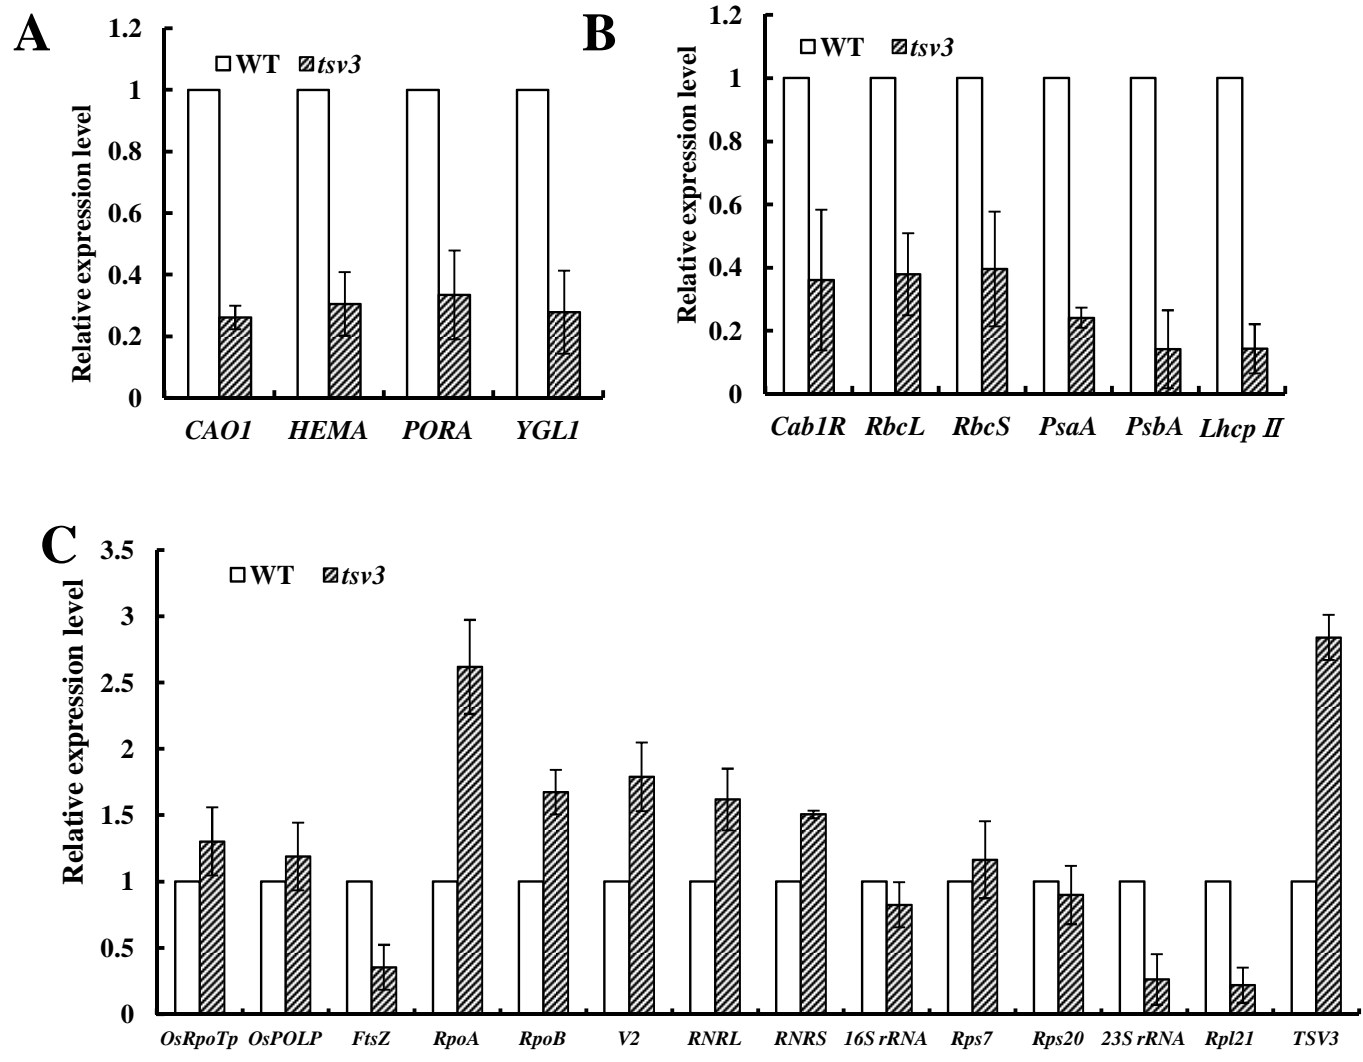

Fig.7



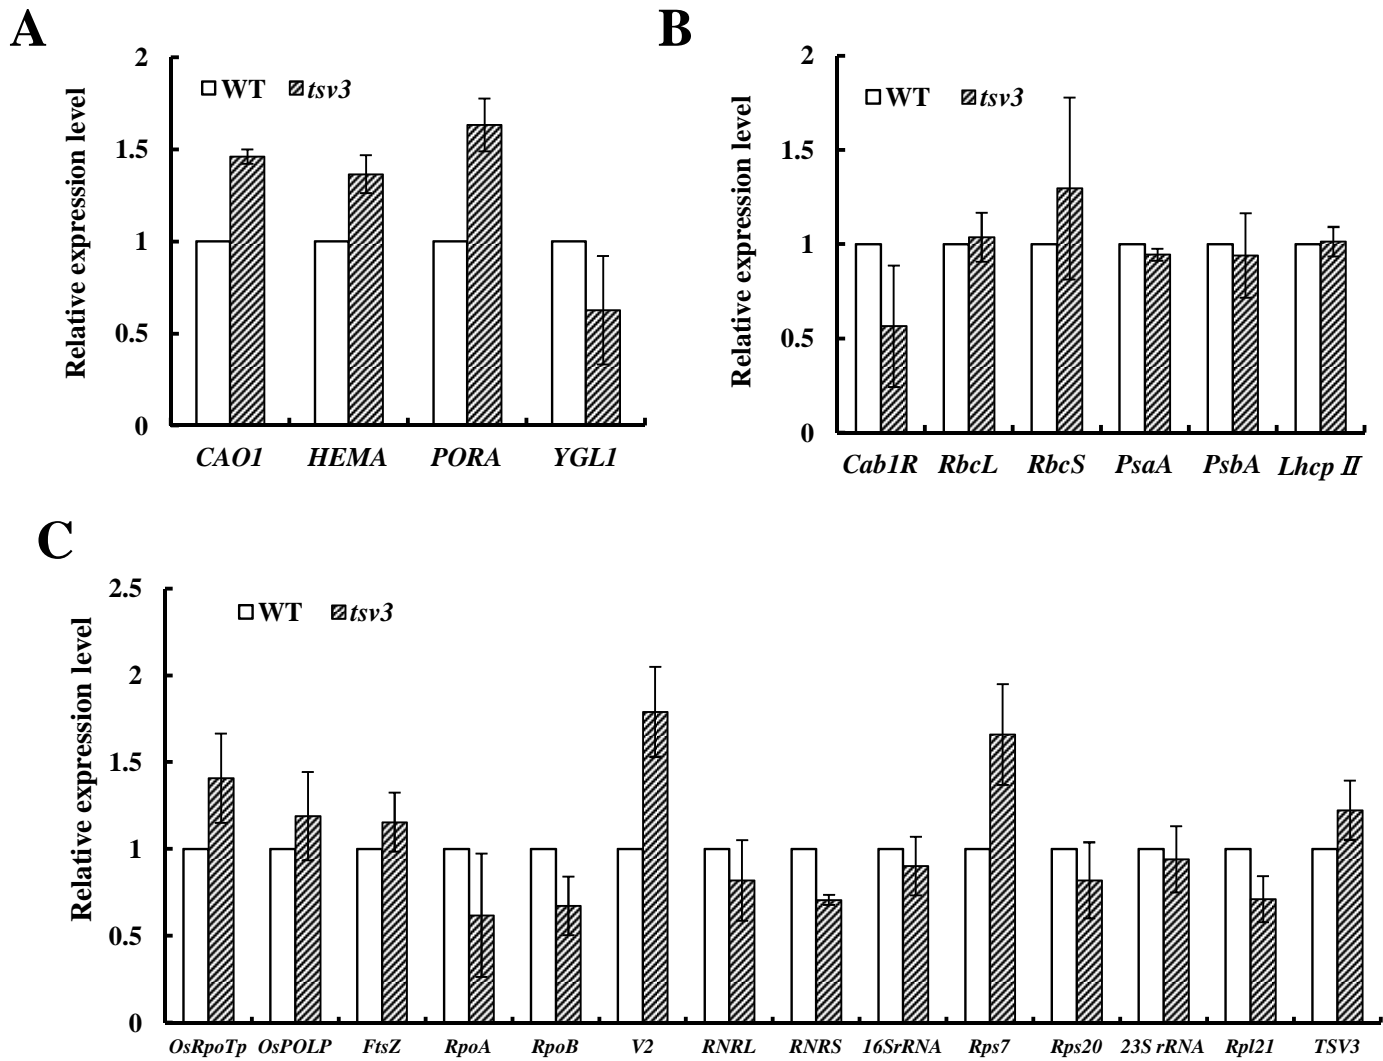

Fig.8

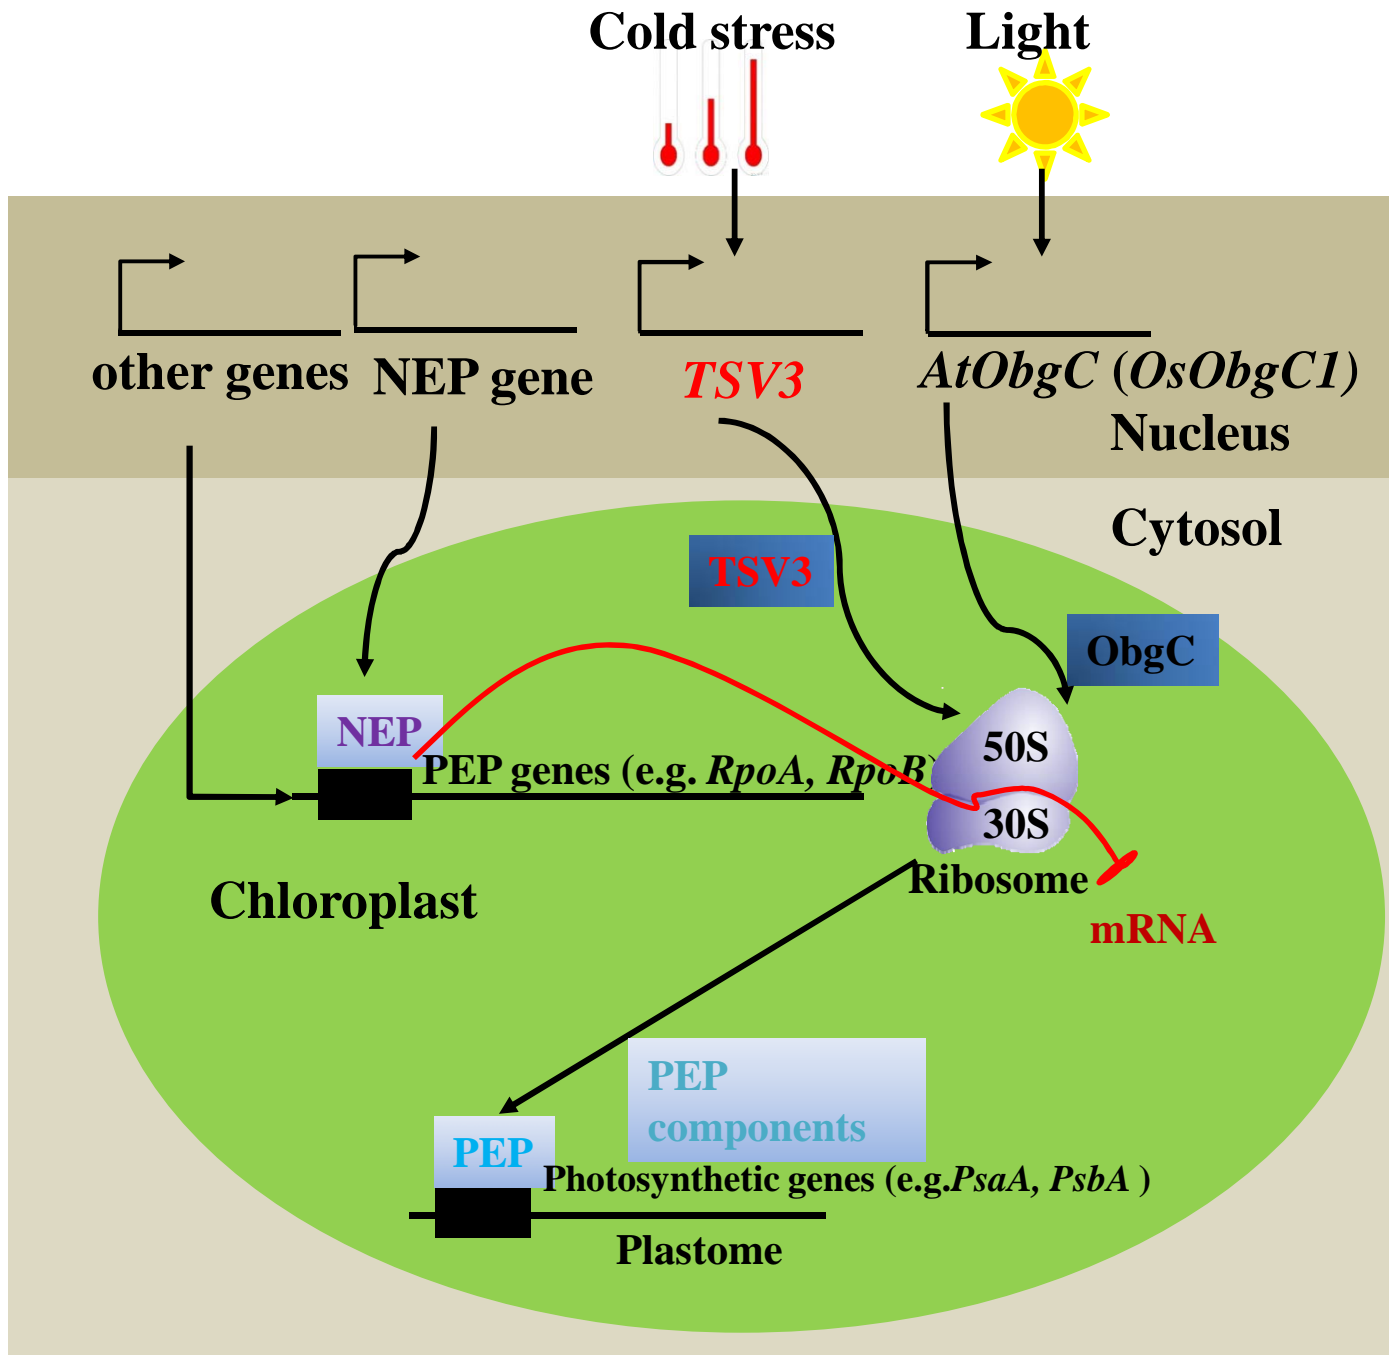

Fig. 9

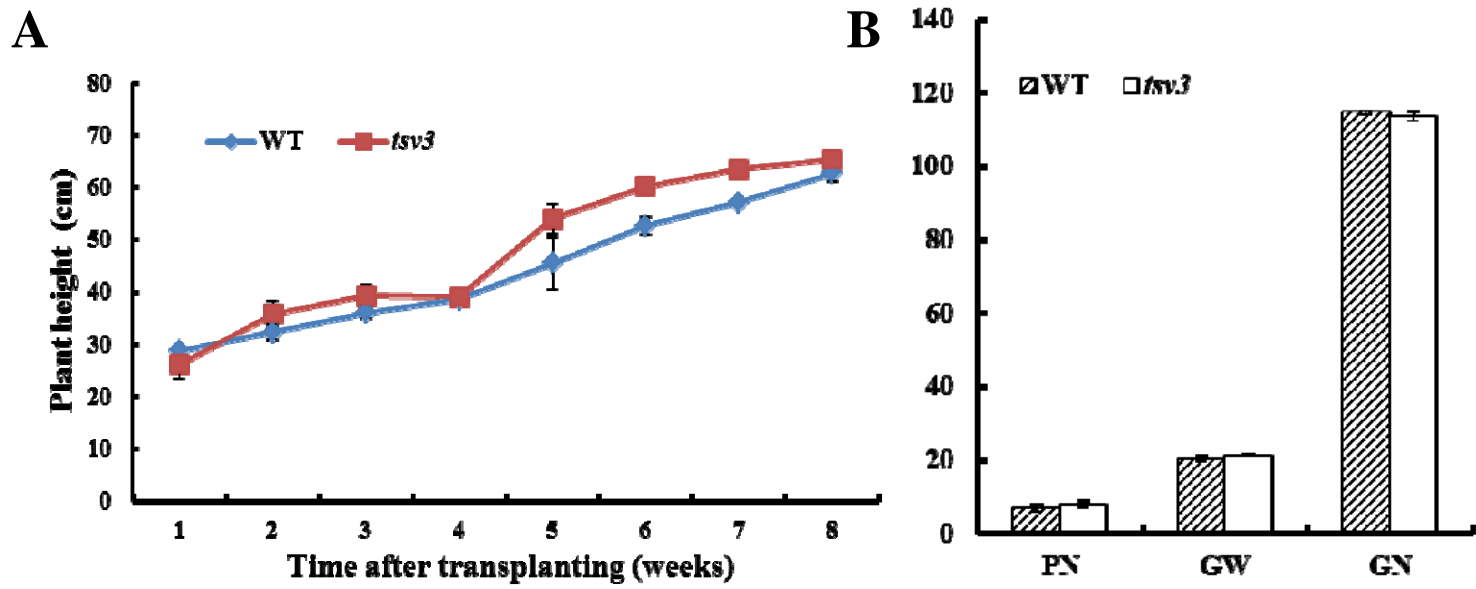

FigS1

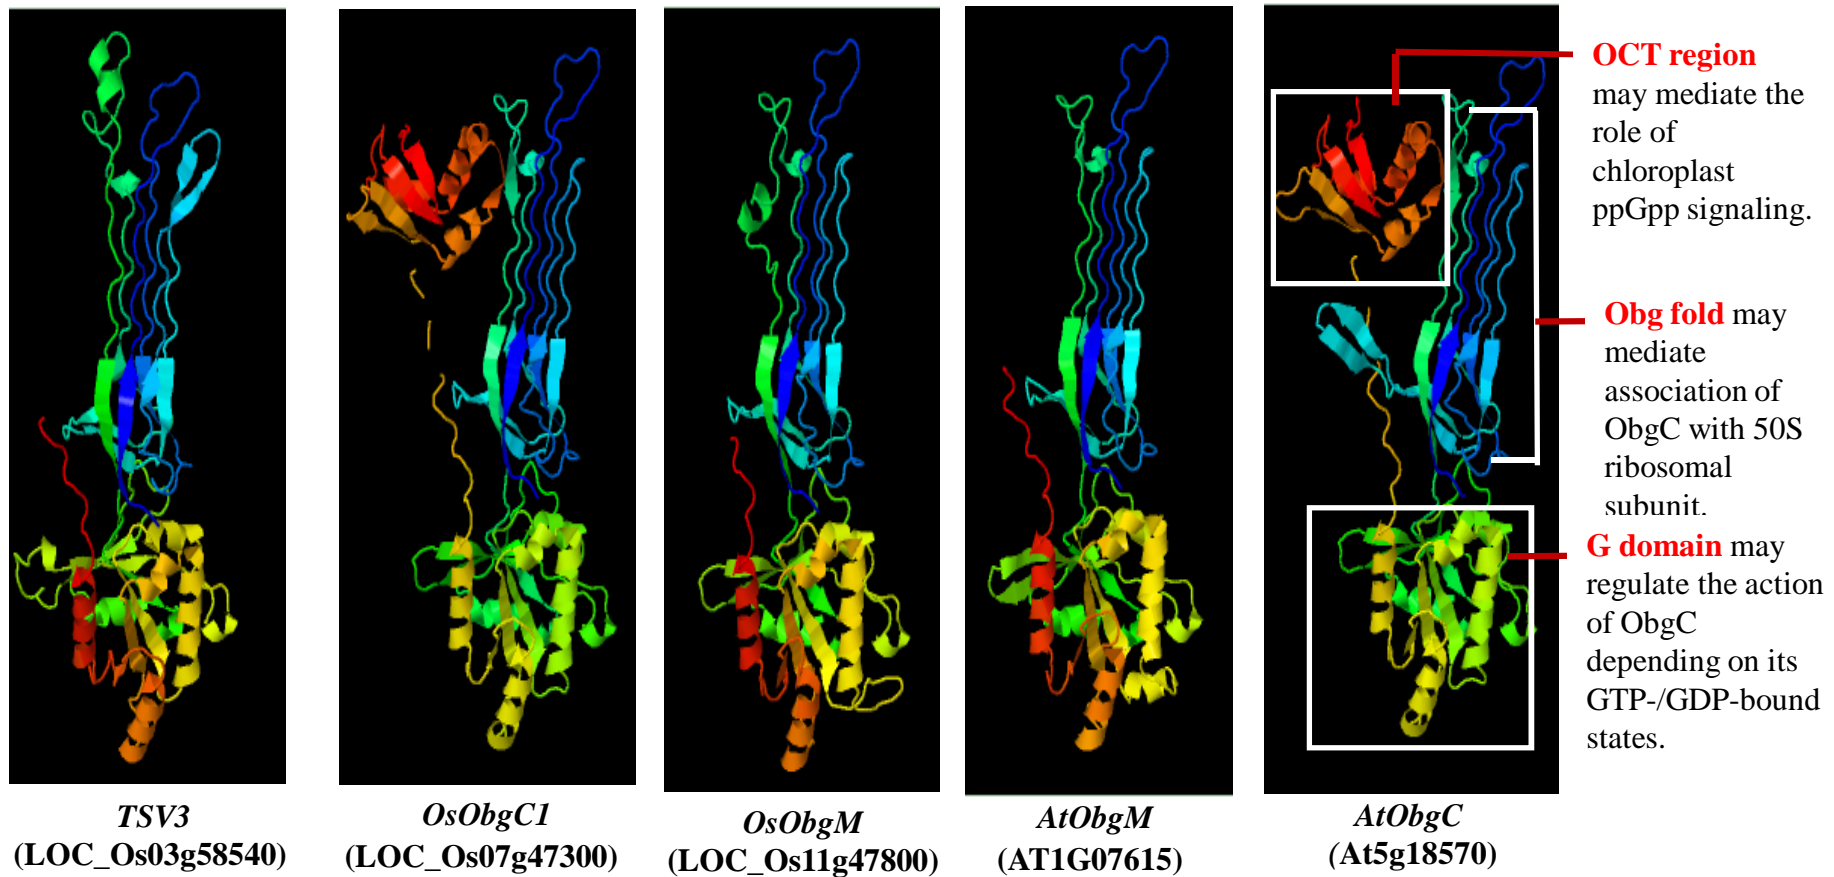

**Fig.S2**

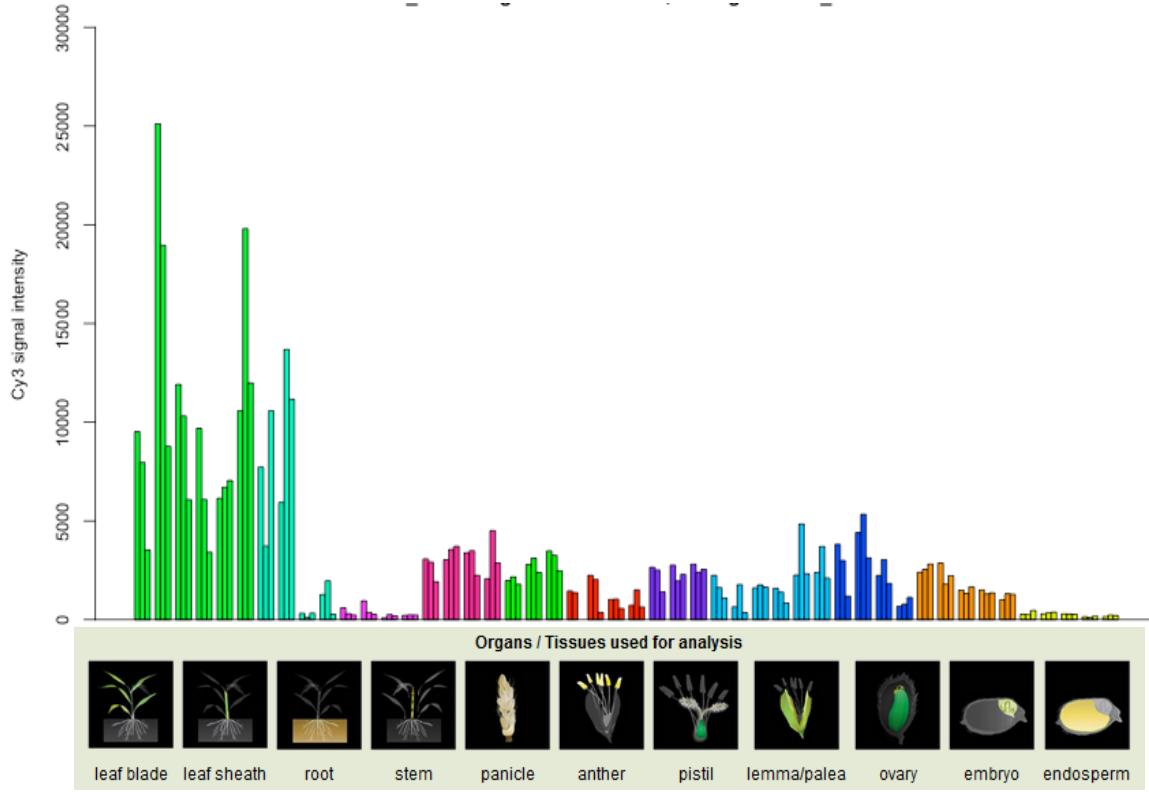

**FigS3**

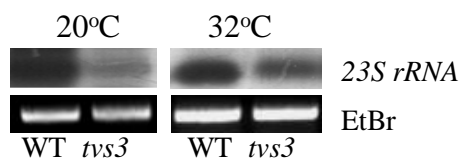

**Fig S4**
